# Supplementary material for: A cuproptosis-related lncRNA signature predicts the prognosis and immune cell status in head and neck squamous cell carcinoma
Source: Front Oncol. 2023 Jul 19;13:1055717. doi: 10.3389/fonc.2023.1055717 (PMC10394648; doi:10.3389/fonc.2023.1055717)
Supplement: Supplementary Table 2 — A list of cuproptosis-related lncRNAs. [file Table_2.xlsx]

## Sheet: Sheet 1
CRGs	CRLs	Symbol	cor	p_value
CDKN2A	ENSG00000224854	CDKN2A-DT	0.677174	4.97958e-35
CDKN2A	ENSG00000233223	lnc-SOX15-1	0.587557	1.08339e-24
CDKN2A	ENSG00000237594	TIAM1-AS1	0.541562	1.57138e-20
CDKN2A	ENSG00000255571	MIR9-3HG	0.545876	6.80406e-21
CDKN2A	ENSG00000258386	lnc-ARHGAP5-2	0.652958	6.87721e-32
CDKN2A	ENSG00000267390	KDSR-DT	0.569829	5.2013e-23
CDKN2A	ENSG00000269210	lnc-SOS1-1	0.557907	6.17907e-22
CDKN2A	ENSG00000270084	GAS5-AS1	0.570961	4.08969e-23
CDKN2A	ENSG00000271420	lnc-TCEA3-1	0.631868	2.22313e-29
CDKN2A	ENSG00000272468	lnc-HIST1H2BJ-3	0.663507	3.20241e-33
DLAT	ENSG00000226688	ENTPD1-AS1	0.404124	2.80089e-11
DLAT	ENSG00000233396	LINC01719	0.355136	7.11857e-09
DLAT	ENSG00000245498	MSANTD2-AS1	0.437191	3.85639e-13
DLAT	ENSG00000254428	lnc-RPS25-5	0.403029	3.203e-11
DLAT	ENSG00000254433	lnc-KBTBD3-1	0.393222	1.04117e-10
DLAT	ENSG00000255062	lnc-SRPRA-3	0.497634	4.13438e-17
DLAT	ENSG00000255121	CENATAC-DT	0.530635	1.24127e-19
DLAT	ENSG00000255455	ENSG00000255455	0.4793	8.02247e-16
DLAT	ENSG00000261098	lnc-CWF19L2-1	0.526425	2.69862e-19
DLAT	ENSG00000278768	BACE1-AS	0.373849	9.56287e-10
DLD	ENSG00000214293	APTR	0.383205	3.33704e-10
DLD	ENSG00000232445	EMSLR	0.494799	6.61678e-17
DLD	ENSG00000236204	LINC01376	0.418162	4.80798e-12
DLD	ENSG00000241764	CBLL1-AS1	0.428323	1.27466e-12
DLD	ENSG00000242154	lnc-KMT2E-12	0.43577	4.68192e-13
DLD	ENSG00000244055	ENSG00000244055	0.405	2.51547e-11
DLD	ENSG00000261363	lnc-MAP1LC3B-5	0.379396	5.14372e-10
DLD	ENSG00000272072	lnc-COG5-3	0.589237	7.41298e-25
DLD	ENSG00000272604	lnc-RINT1-3	0.577702	9.59425e-24
DLD	ENSG00000280109	PLAC4	0.380907	4.33515e-10
FDX1	ENSG00000203497	PDCD4-AS1	0.375957	7.56573e-10
FDX1	ENSG00000227165	WDR11-DT	0.390991	1.35411e-10
FDX1	ENSG00000231312	MAP4K3-DT	0.385392	2.59635e-10
FDX1	ENSG00000246067	RAB30-DT	0.388238	1.86769e-10
FDX1	ENSG00000255062	lnc-SRPRA-3	0.496412	5.06585e-17
FDX1	ENSG00000271855	lnc-IAH1-2	0.39776	6.06284e-11
FDX1	ENSG00000274667	lnc-MNS1-11	0.377036	6.7064e-10
FDX1	ENSG00000276390	lnc-ENDOU-7	0.407528	1.84067e-11
FDX1	ENSG00000278376	lnc-CXCR5-1	0.39786	5.99078e-11
FDX1	ENSG00000279342	lnc-ESAM-65	0.401205	3.99985e-11
GLS	ENSG00000125899	LINC02871	0.400395	4.41241e-11
GLS	ENSG00000224017	LINC01449	0.389645	1.58522e-10
GLS	ENSG00000224116	INHBA-AS1	0.471986	2.49448e-15
GLS	ENSG00000227726	lnc-FGF3-4	0.394118	9.36387e-11
GLS	ENSG00000235531	MSC-AS1	0.390325	1.46415e-10
GLS	ENSG00000235852	lnc-STAT1-2	0.482026	5.22055e-16
GLS	ENSG00000239332	LINC01119	0.396004	7.48145e-11
GLS	ENSG00000256915	lnc-MSRB3-3	0.396779	6.81933e-11
GLS	ENSG00000257761	lnc-ZFC3H1-1	0.384695	2.81324e-10
GLS	ENSG00000267510	lnc-ZNF559-3	0.392331	1.15664e-10
LIAS	ENSG00000182165	TP53TG1	0.445743	1.17756e-13
LIAS	ENSG00000233184	lnc-SLC30A7-2	0.513809	2.59529e-18
LIAS	ENSG00000255857	PXN-AS1	0.458927	1.76985e-14
LIAS	ENSG00000270147	ENSG00000270147	0.470986	2.90716e-15
LIAS	ENSG00000270460	lnc-CDCA7-1	0.449289	7.12979e-14
LIAS	ENSG00000271971	lnc-RBM12B-4	0.512085	3.51107e-18
LIAS	ENSG00000272010	lnc-ARMC1-3	0.458416	1.90754e-14
LIAS	ENSG00000272677	HNRNPD-DT	0.453246	4.04537e-14
LIAS	ENSG00000273156	lnc-HNRNPD-1	0.475008	1.56635e-15
LIAS	ENSG00000276148	lnc-YARS2-4	0.447338	9.40364e-14
LIPT1	ENSG00000179523	EIF3J-DT	0.546594	5.9127e-21
LIPT1	ENSG00000225470	JPX	0.548648	3.94892e-21
LIPT1	ENSG00000232995	lnc-RGS5-1	0.562064	2.63707e-22
LIPT1	ENSG00000234912	SNHG20	0.574245	2.02657e-23
LIPT1	ENSG00000236859	NIFK-AS1	0.595098	1.93996e-25
LIPT1	ENSG00000259623	lnc-KLHL11-1	0.556763	7.79484e-22
LIPT1	ENSG00000266490	ENSG00000266490	0.545479	7.35277e-21
LIPT1	ENSG00000269815	lnc-USHBP1-1	0.577011	1.11485e-23
LIPT1	ENSG00000272654	lnc-CREB3L4-4	0.54268	1.2663e-20
LIPT1	ENSG00000272902	TBC1D8-AS1	0.549558	3.29905e-21
MTF1	ENSG00000224888	ENSG00000224888	0.405723	2.30121e-11
MTF1	ENSG00000229368	lnc-PGAP2-1	0.418823	4.41635e-12
MTF1	ENSG00000235499	lnc-TET3-2	0.458504	1.8832e-14
MTF1	ENSG00000249456	ENSG00000249456	0.553111	1.62684e-21
MTF1	ENSG00000257797	lnc-JMJD7-PLA2G4B-5	0.390924	1.36478e-10
MTF1	ENSG00000258689	LINC01269	0.469324	3.74438e-15
MTF1	ENSG00000259430	CERS3-AS1	0.418084	4.85636e-12
MTF1	ENSG00000268858	lnc-ZBTB46-2	0.376275	7.30168e-10
MTF1	ENSG00000269910	lnc-XRCC3-3	0.503207	1.61943e-17
MTF1	ENSG00000269940	lnc-ZFYVE21-2	0.42443	2.13094e-12
PDHA1	ENSG00000178803	ADORA2A-AS1	0.633755	1.34984e-29
PDHA1	ENSG00000214381	LINC00488	0.664578	2.32943e-33
PDHA1	ENSG00000223956	LINC01767	0.676878	5.46366e-35
PDHA1	ENSG00000227619	lnc-NTMT1-2	0.608629	7.89303e-27
PDHA1	ENSG00000250915	lnc-HMX1-1	0.617359	9.20636e-28
PDHA1	ENSG00000259033	lnc-ADAM21-3	0.621318	3.39719e-28
PDHA1	ENSG00000260439	LMF1-AS1	0.613405	2.4563e-27
PDHA1	ENSG00000263312	LINC01975	0.611594	3.83297e-27
PDHA1	ENSG00000274253	lnc-NIPA1-2	0.639618	2.80182e-30
PDHA1	ENSG00000279168	lnc-POLR2J2-1	0.619674	5.14859e-28
PDHB	ENSG00000206573	THUMPD3-AS1	0.556233	8.67932e-22
PDHB	ENSG00000221883	ARIH2OS	0.491769	1.08858e-16
PDHB	ENSG00000225733	FGD5-AS1	0.526402	2.71025e-19
PDHB	ENSG00000244513	EOGT-DT	0.530116	1.36692e-19
PDHB	ENSG00000245281	ASAH1-AS1	0.507662	7.562e-18
PDHB	ENSG00000254485	ENSG00000254485	0.504762	1.24295e-17
PDHB	ENSG00000257660	ADCY6-DT	0.505919	1.02002e-17
PDHB	ENSG00000271976	lnc-ACTR8-1	0.558923	5.02417e-22
PDHB	ENSG00000272182	ENSG00000272182	0.549531	3.31668e-21
PDHB	ENSG00000272654	lnc-CREB3L4-4	0.500414	2.59601e-17
