# Supplementary material for: A cuproptosis-related lncRNA signature predicts the prognosis and immune cell status in head and neck squamous cell carcinoma
Source: Front Oncol. 2023 Jul 19;13:1055717. doi: 10.3389/fonc.2023.1055717 (PMC10394648; doi:10.3389/fonc.2023.1055717)
Supplement: Supplementary Table 3 — A list of protein conding RNAs correlated with CRLs. [file Table_3.xlsx]

## Sheet: Sheet 1
CRLs	protein_conding_RNAs	cor	p_value
ADCY6-DT	PON1	0.627426	3.08366e-34
ADCY6-DT	DPEP1	0.65235	9.44922e-38
ADCY6-DT	PLEKHB1	0.631192	9.5217e-35
ADCY6-DT	SLC18A1	0.633887	4.06484e-35
ADCY6-DT	TSPAN32	0.731633	1.61991e-51
ADCY6-DT	FGF4	0.694405	1.70493e-44
ADCY6-DT	TUBA3D	0.612252	2.99601e-32
ADCY6-DT	FGF20	0.681984	2.19504e-42
ADCY6-DT	MYH7B	0.68161	2.53089e-42
ADCY6-DT	TRPM3	0.654702	4.233e-38
ADCY6-DT	MT3	0.696152	8.43789e-45
ADCY6-DT	BAMBI	0.673135	6.04933e-41
ADCY6-DT	IGFALS	0.708259	5.59651e-47
ADCY6-DT	SEZ6L	0.668989	2.74974e-40
ADCY6-DT	BMX	0.600946	7.74274e-31
ADCY6-DT	MT4	0.673477	5.33151e-41
ADCY6-DT	IQCH	0.670203	1.76962e-40
ADCY6-DT	DKK4	0.661438	4.07791e-39
ADCY6-DT	AURKC	0.604928	2.49975e-31
ADCY6-DT	EVX1	0.619173	3.83256e-33
ADCY6-DT	PKD2L1	0.651281	1.35836e-37
ADCY6-DT	FGF8	0.736674	1.47105e-52
ADCY6-DT	HGFAC	0.681983	2.19597e-42
ADCY6-DT	DBX1	0.699532	2.13371e-45
ADCY6-DT	APOA5	0.60217	5.48027e-31
ADCY6-DT	SLC1A2	0.667748	4.30766e-40
ADCY6-DT	IL23A	0.633245	4.98309e-35
ADCY6-DT	ACSS3	0.665836	8.56088e-40
ADCY6-DT	SLC30A3	0.65759	1.56385e-38
ADCY6-DT	QPCT	0.617076	7.18467e-33
ADCY6-DT	OPRD1	0.712586	8.75312e-48
ADCY6-DT	CA14	0.625725	5.21504e-34
ADCY6-DT	OLFM3	0.68089	3.32844e-42
ADCY6-DT	HOXB8	0.676767	1.57228e-41
ADCY6-DT	HOXB5	0.648444	3.53043e-37
ADCY6-DT	LYZL1	0.660155	6.39738e-39
ADCY6-DT	DBH	0.604667	2.69378e-31
ADCY6-DT	TRIM51	0.65151	1.25689e-37
ADCY6-DT	BMP4	0.643506	1.8181e-36
ADCY6-DT	BHLHE23	0.68263	1.71467e-42
ADCY6-DT	FOXA2	0.630804	1.07552e-34
ADCY6-DT	GFRA4	0.709307	3.58238e-47
ADCY6-DT	OTOR	0.685574	5.52614e-43
ADCY6-DT	GAD1	0.701474	9.59944e-46
ADCY6-DT	POLN	0.648559	3.39769e-37
ADCY6-DT	ABHD12B	0.631284	9.24887e-35
ADCY6-DT	ATP1A4	0.673079	6.17549e-41
ADCY6-DT	NMUR2	0.661067	4.64551e-39
ADCY6-DT	TPTE2	0.670288	1.71571e-40
ADCY6-DT	CNMD	0.675766	2.28434e-41
ADCY6-DT	MGARP	0.666611	6.48389e-40
ADCY6-DT	TTPA	0.701244	1.05578e-45
ADCY6-DT	GGH	0.645697	8.8192e-37
ADCY6-DT	LRRC49	0.612225	3.01966e-32
ADCY6-DT	TTLL7	0.603373	3.89486e-31
ADCY6-DT	PREB	0.65951	8.01499e-39
ADCY6-DT	PLA2G12B	0.685913	4.84652e-43
ADCY6-DT	PDE5A	0.642569	2.47252e-36
ADCY6-DT	SYCP3	0.725857	2.3694e-50
ADCY6-DT	SLC39A5	0.744379	3.37261e-54
ADCY6-DT	REM2	0.648111	3.94664e-37
ADCY6-DT	NKD1	0.668883	2.85749e-40
ADCY6-DT	ADAMTS18	0.609246	7.20359e-32
ADCY6-DT	HUNK	0.637084	1.46494e-35
ADCY6-DT	ABHD1	0.718649	6.13166e-49
ADCY6-DT	TMEFF2	0.677454	1.21595e-41
ADCY6-DT	CPNE9	0.661888	3.47971e-39
ADCY6-DT	IL17RD	0.708796	4.45433e-47
ADCY6-DT	SHISAL2B	0.686838	3.38532e-43
ADCY6-DT	ADAMTS19	0.707062	9.29483e-47
ADCY6-DT	CPLX2	0.673059	6.22113e-41
ADCY6-DT	ST18	0.602025	5.70858e-31
ADCY6-DT	ACTL7B	0.698204	3.67141e-45
ADCY6-DT	TRIM48	0.680059	4.56e-42
ADCY6-DT	CNDP1	0.705904	1.51506e-46
ADCY6-DT	LYZL2	0.743794	4.51284e-54
ADCY6-DT	ALLC	0.688794	1.57692e-43
ADCY6-DT	PTH	0.681432	2.70878e-42
ADCY6-DT	SH2D6	0.646904	5.90587e-37
ADCY6-DT	CLEC4F	0.666468	6.82635e-40
ADCY6-DT	SLC16A12	0.64026	5.25305e-36
ADCY6-DT	FEZF2	0.62619	4.5189e-34
ADCY6-DT	XAGE2	0.644902	1.14758e-36
ADCY6-DT	RAB39B	0.637568	1.25399e-35
ADCY6-DT	MICU3	0.602624	4.81845e-31
ADCY6-DT	WIF1	0.638987	7.93504e-36
ADCY6-DT	NODAL	0.622373	1.45563e-33
ADCY6-DT	CABP1	0.663292	2.11849e-39
ADCY6-DT	HPD	0.681375	2.76823e-42
ADCY6-DT	CPA2	0.649538	2.44565e-37
ADCY6-DT	ITLN2	0.660253	6.17994e-39
ADCY6-DT	PRAC1	0.674587	3.53843e-41
ADCY6-DT	FGF19	0.649399	2.56231e-37
ADCY6-DT	DIRAS3	0.66239	2.91497e-39
ADCY6-DT	KCNJ9	0.6645	1.37946e-39
ADCY6-DT	MSX1	0.669881	1.98954e-40
ADCY6-DT	ALPI	0.681527	2.61246e-42
ADCY6-DT	CADPS	0.654696	4.24168e-38
ADCY6-DT	DNAJC5G	0.657236	1.7676e-38
ADCY6-DT	OTOP1	0.681104	3.06844e-42
ADCY6-DT	ADAD1	0.682692	1.67506e-42
ADCY6-DT	CARTPT	0.691886	4.6575e-44
ADCY6-DT	SLC13A4	0.634355	3.50318e-35
ADCY6-DT	DEFA5	0.679874	4.89038e-42
ADCY6-DT	DEFA6	0.67986	4.91746e-42
ADCY6-DT	PHOX2A	0.64477	1.19851e-36
ADCY6-DT	NAT16	0.670721	1.46497e-40
ADCY6-DT	CA4	0.675562	2.46384e-41
ADCY6-DT	AXIN2	0.668758	2.98992e-40
ADCY6-DT	CA7	0.657478	1.62545e-38
ADCY6-DT	ASPSCR1	0.727654	1.03602e-50
ADCY6-DT	TAS2R1	0.678982	6.85095e-42
ADCY6-DT	GSX1	0.684428	8.60198e-43
ADCY6-DT	TRH	0.680099	4.49171e-42
ADCY6-DT	OR1N1	0.67943	5.78549e-42
ADCY6-DT	PAH	0.666846	5.95959e-40
ADCY6-DT	SNTB1	0.61002	5.75282e-32
ADCY6-DT	MOS	0.682101	2.09902e-42
ADCY6-DT	MST1	0.622168	1.54931e-33
ADCY6-DT	NUDT4	0.631565	8.4663e-35
ADCY6-DT	KRT28	0.680205	4.31489e-42
ADCY6-DT	CA5A	0.655563	3.14952e-38
ADCY6-DT	PCCA	0.683211	1.37317e-42
ADCY6-DT	FAM9B	0.677874	1.03916e-41
ADCY6-DT	RIMKLA	0.750934	1.21861e-55
ADCY6-DT	KCNJ10	0.632697	5.92581e-35
ADCY6-DT	LCN15	0.681625	2.51701e-42
ADCY6-DT	TSPYL6	0.687441	2.67607e-43
ADCY6-DT	PRSS36	0.618429	4.7917e-33
ADCY6-DT	AMBN	0.681433	2.70731e-42
ADCY6-DT	CA8	0.622653	1.33644e-33
ADCY6-DT	GPR35	0.642941	2.18843e-36
ADCY6-DT	GDPD4	0.676701	1.61203e-41
ADCY6-DT	RIIAD1	0.675749	2.29837e-41
ADCY6-DT	GRM8	0.687449	2.6681e-43
ADCY6-DT	CLRN3	0.634673	3.16688e-35
ADCY6-DT	DCAF4L1	0.679151	6.42666e-42
ADCY6-DT	NXPH3	0.640656	4.61861e-36
ADCY6-DT	C14orf180	0.671585	1.06835e-40
ADCY6-DT	LCN12	0.723186	8.00445e-50
ADCY6-DT	NOTUM	0.685175	6.44783e-43
ADCY6-DT	NRG3	0.695566	1.06908e-44
ADCY6-DT	TMEM210	0.619105	3.91153e-33
ADCY6-DT	PRSS38	0.682788	1.61471e-42
ADCY6-DT	SPATA12	0.625906	4.93329e-34
ADCY6-DT	PTRH1	0.610491	5.01457e-32
ADCY6-DT	LYPD6	0.62526	6.01875e-34
ADCY6-DT	SPATA21	0.63841	9.56059e-36
ADCY6-DT	KRTAP10-8	0.694122	1.9096e-44
ADCY6-DT	OTOG	0.71967	3.89082e-49
ADCY6-DT	BSX	0.638268	1.00104e-35
ADCY6-DT	ZAR1L	0.696205	8.25909e-45
ADCY6-DT	OR8A1	0.607181	1.30923e-31
ADCY6-DT	CRYBA4	0.69457	1.59566e-44
ADCY6-DT	KRT39	0.679665	5.29402e-42
ADCY6-DT	TEX43	0.692204	4.10545e-44
ADCY6-DT	CACNA1E	0.630021	1.37457e-34
ADCY6-DT	AKR1C4	0.649624	2.37585e-37
ADCY6-DT	TEX45	0.687743	2.37921e-43
ADCY6-DT	EPS8L3	0.643942	1.57523e-36
ADCY6-DT	C1orf146	0.699532	2.13427e-45
ADCY6-DT	GLYATL3	0.627544	2.97263e-34
ADCY6-DT	SP5	0.749682	2.31615e-55
ADCY6-DT	MANSC4	0.673853	4.64171e-41
ADCY6-DT	KRTAP3-1	0.64578	8.57869e-37
ADCY6-DT	EFCAB8	0.667171	5.30187e-40
ADCY6-DT	TRIM51GP	0.7016	9.11233e-46
ADCY6-DT	KRTAP1-3	0.697535	4.81869e-45
ADCY6-DT	CLDN25	0.651718	1.17124e-37
ADCY6-DT	ASCL5	0.619514	3.45881e-33
ADCY6-DT	PHGR1	0.600412	9.0016e-31
ADCY6-DT	MBD3L5	0.601139	7.33354e-31
ADCY6-DT	SHISA9	0.693652	2.30464e-44
ADCY6-DT	TDGF1	0.685275	6.20431e-43
ADCY6-DT	LY6G6D	0.682079	2.11669e-42
ADCY6-DT	TERB1	0.690199	9.07682e-44
ADCY6-DT	LY6G6F-LY6G6D	0.68825	1.95132e-43
ADCY6-DT	SLC22A31	0.628485	2.21953e-34
ADCY6-DT	LY6L	0.710164	2.48351e-47
ADCY6-DT	C2orf15	0.60307	4.24559e-31
ADCY6-DT	PKD1L3	0.680904	3.31113e-42
ADORA2A-AS1	YBX2	0.697228	5.45985e-45
ADORA2A-AS1	SOX30	0.664209	1.52995e-39
ADORA2A-AS1	STAG3	0.765183	6.168e-59
ADORA2A-AS1	XRCC1	0.667046	5.54556e-40
ADORA2A-AS1	SMC1B	0.710618	2.0443e-47
ADORA2A-AS1	TP73	0.647994	4.10458e-37
ADORA2A-AS1	CBX5	0.613111	2.32762e-32
ADORA2A-AS1	MYO3A	0.677925	1.01928e-41
ADORA2A-AS1	UPB1	0.841598	1.03982e-81
ADORA2A-AS1	YPEL1	0.609997	5.79137e-32
ADORA2A-AS1	MCM5	0.60719	1.30581e-31
ADORA2A-AS1	FOXRED2	0.6494	2.56138e-37
ADORA2A-AS1	ZFR2	0.720547	2.62907e-49
ADORA2A-AS1	LIG1	0.663457	1.99826e-39
ADORA2A-AS1	TIMELESS	0.608811	8.17298e-32
ADORA2A-AS1	RPA2	0.626556	4.03596e-34
ADORA2A-AS1	ZNF541	0.71437	4.03272e-48
ADORA2A-AS1	CDKN2C	0.698314	3.50945e-45
ADORA2A-AS1	TCP11	0.645349	9.89766e-37
ADORA2A-AS1	MCM8	0.607097	1.3413e-31
ADORA2A-AS1	RIBC2	0.660193	6.31316e-39
ADORA2A-AS1	BRME1	0.629213	1.76899e-34
ADORA2A-AS1	IGFBPL1	0.667378	4.92173e-40
ADORA2A-AS1	PRDM15	0.621435	1.93521e-33
ADORA2A-AS1	RAD9B	0.698011	3.97106e-45
ADORA2A-AS1	CHAF1B	0.609805	6.12451e-32
ADORA2A-AS1	GRIN2C	0.624647	7.2644e-34
ADORA2A-AS1	KASH5	0.664438	1.40976e-39
ADORA2A-AS1	SYCE2	0.659593	7.78581e-39
ADORA2A-AS1	SAP30L	0.623785	9.45989e-34
ADORA2A-AS1	MEI1	0.633721	4.28423e-35
ADORA2A-AS1	C5orf34	0.64027	5.23474e-36
ADORA2A-AS1	CNTD1	0.672106	8.82749e-41
ADORA2A-AS1	POLE	0.605003	2.44674e-31
ADORA2A-AS1	KCNB2	0.622239	1.516e-33
ADORA2A-AS1	INPP5F	0.639756	6.18503e-36
APTR	ABHD11	0.620507	2.56343e-33
APTR	PRKRIP1	0.607955	1.0472e-31
APTR	ZC3H8	0.635282	2.60822e-35
APTR	ZNF3	0.638634	8.89543e-36
APTR	RSBN1L	0.669779	2.06486e-40
ARIH2OS	SPPL2B	0.609292	7.10948e-32
ARIH2OS	PAFAH1B3	0.606668	1.51785e-31
ARIH2OS	CIRBP	0.610534	4.95302e-32
ARIH2OS	CDK5RAP3	0.634282	3.58561e-35
ARIH2OS	NPRL2	0.711464	1.42101e-47
ARIH2OS	HEMK1	0.655459	3.26369e-38
ARIH2OS	MRPS26	0.607933	1.05399e-31
ARIH2OS	PCED1A	0.623218	1.12505e-33
ARIH2OS	NEIL1	0.609322	7.04744e-32
ARIH2OS	SLC25A38	0.617482	6.36358e-33
ARIH2OS	BEND5	0.653586	6.20186e-38
ARIH2OS	ACP6	0.622137	1.5636e-33
ARIH2OS	ELP6	0.624492	7.61794e-34
ARIH2OS	GDF9	0.610122	5.5842e-32
ARIH2OS	GKAP1	0.617074	7.18813e-33
ARIH2OS	POLL	0.602302	5.27881e-31
ARIH2OS	HEXIM2	0.611036	4.27735e-32
ARIH2OS	TMEM42	0.623393	1.06641e-33
ARIH2OS	ATP6V0E2	0.632091	7.17394e-35
ARIH2OS	C12orf76	0.609384	6.92093e-32
ARIH2OS	PCP2	0.600806	8.0544e-31
ARIH2OS	NDUFAF3	0.619438	3.53911e-33
ARIH2OS	P4HTM	0.607427	1.21978e-31
ARIH2OS	ACBD4	0.633653	4.37791e-35
ARIH2OS	BRICD5	0.623642	9.88361e-34
ARIH2OS	TRAIP	0.618621	4.52438e-33
ARIH2OS	TSPYL2	0.613053	2.36729e-32
ARIH2OS	H1-10	0.60051	8.75569e-31
ARIH2OS	PJVK	0.608916	7.92855e-32
ARIH2OS	C12orf73	0.654642	4.32199e-38
ARIH2OS	SMIM45	0.624838	6.8503e-34
ARIH2OS	CCDC183	0.613175	2.28401e-32
ARIH2OS	MXD3	0.650315	1.8827e-37
ARIH2OS	LYRM9	0.610376	5.18635e-32
ASAH1-AS1	GKAP1	0.605802	1.9466e-31
ASAH1-AS1	DUSP28	0.610497	5.00639e-32
BACE1-AS	LUC7L3	0.619138	3.87338e-33
BACE1-AS	MSANTD2	0.691609	5.19792e-44
BACE1-AS	RSAD1	0.611377	3.87114e-32
BACE1-AS	ACAD8	0.660946	4.84695e-39
BACE1-AS	HINFP	0.649165	2.77192e-37
BACE1-AS	SH2B1	0.63919	7.43196e-36
BACE1-AS	CENATAC	0.60894	7.87434e-32
CDKN2A-DT	CDKN2A	0.677045	1.4171e-41
EIF3J-DT	NDUFAF7	0.629752	1.49504e-34
EIF3J-DT	MKS1	0.64061	4.68689e-36
EIF3J-DT	LUC7L3	0.612218	3.0262e-32
EIF3J-DT	FANCL	0.601046	7.5294e-31
EIF3J-DT	NFYB	0.614125	1.72603e-32
EIF3J-DT	OARD1	0.602249	5.35832e-31
EIF3J-DT	ORMDL1	0.635327	2.57116e-35
EIF3J-DT	RPAIN	0.612141	3.09546e-32
EIF3J-DT	ZNF280D	0.609738	6.24436e-32
EIF3J-DT	ANKAR	0.623086	1.17144e-33
EIF3J-DT	C21orf58	0.604485	2.8371e-31
EIF3J-DT	KLHDC9	0.601227	7.15358e-31
EIF3J-DT	GKAP1	0.604062	3.20089e-31
EIF3J-DT	NUDT13	0.600976	7.67791e-31
EIF3J-DT	HEXIM2	0.652953	7.69836e-38
EIF3J-DT	C12orf76	0.633239	4.99238e-35
EIF3J-DT	COA5	0.64496	1.12571e-36
EIF3J-DT	ZNF785	0.620064	2.9299e-33
EIF3J-DT	ZNF248	0.626422	4.20705e-34
EIF3J-DT	C12orf73	0.603056	4.26257e-31
EIF3J-DT	ZBED8	0.601653	6.34273e-31
EIF3J-DT	C22orf39	0.60041	9.00621e-31
EIF3J-DT	ZNF512	0.623475	1.04015e-33
EMSLR	SLC25A13	0.631009	1.00829e-34
EMSLR	GTPBP10	0.635677	2.29891e-35
EMSLR	DNAJC2	0.731653	1.6044e-51
EMSLR	MTERF1	0.616374	8.85662e-33
EMSLR	LRWD1	0.647907	4.22504e-37
EMSLR	ORC5	0.712156	1.05393e-47
EMSLR	ARMC10	0.662291	3.019e-39
EMSLR	ZNF655	0.626957	3.56513e-34
EMSLR	FAM185A	0.641467	3.54506e-36
ENSG00000224888	ANKRD11	0.654056	5.28238e-38
ENSG00000224888	KMT2D	0.610527	4.96285e-32
ENSG00000224888	ATXN1L	0.619855	3.12117e-33
ENSG00000244055	CLDN15	0.604726	2.64842e-31
ENSG00000244055	PEX1	0.690817	7.11269e-44
ENSG00000244055	RBM48	0.60226	5.34172e-31
ENSG00000244055	DMTF1	0.631341	9.08486e-35
ENSG00000244055	GIGYF1	0.697549	4.79187e-45
ENSG00000244055	TSSK3	0.617327	6.66549e-33
ENSG00000244055	GTF2IRD2B	0.600685	8.33408e-31
ENSG00000244055	GTF2IRD2	0.616178	9.39025e-33
ENSG00000244055	ZNF789	0.706406	1.22644e-46
ENSG00000244055	MDM4	0.605796	1.94977e-31
ENSG00000244055	TTLL3	0.609901	5.95616e-32
ENSG00000244055	NBPF11	0.620059	2.93463e-33
ENSG00000244055	NBPF12	0.607254	1.28212e-31
ENSG00000249456	ZRANB1	0.81164	1.51487e-71
ENSG00000249456	MFAP3	0.601534	6.55916e-31
ENSG00000249456	WAPL	0.61218	3.05976e-32
ENSG00000249456	EP300	0.617373	6.57569e-33
ENSG00000249456	EIF3A	0.682194	2.02568e-42
ENSG00000249456	ATE1	0.634928	2.92002e-35
ENSG00000249456	CCSER2	0.661144	4.52145e-39
ENSG00000249456	TNKS2	0.654333	4.80372e-38
ENSG00000249456	SHOC2	0.600254	9.40873e-31
ENSG00000249456	MED13	0.609962	5.85124e-32
ENSG00000249456	USP34	0.646522	6.70471e-37
ENSG00000249456	ASH1L	0.60597	1.8549e-31
ENSG00000249456	PUM1	0.602809	4.57164e-31
ENSG00000249456	ASXL2	0.6125	2.78603e-32
ENSG00000249456	TAOK1	0.618051	5.36796e-33
ENSG00000249456	HIPK1	0.600179	9.60975e-31
ENSG00000249456	PDZD8	0.625551	5.50335e-34
ENSG00000249456	CCDC186	0.636811	1.59939e-35
ENSG00000249456	KMT2D	0.601838	6.01998e-31
ENSG00000249456	SEC24C	0.654966	3.86678e-38
ENSG00000254485	SLC18A1	0.640618	4.67538e-36
ENSG00000254485	TSPAN32	0.60519	2.31942e-31
ENSG00000254485	MT3	0.610772	4.62016e-32
ENSG00000254485	MYEF2	0.620445	2.61162e-33
ENSG00000254485	QPCT	0.603827	3.42274e-31
ENSG00000254485	GAD1	0.619932	3.0493e-33
ENSG00000254485	MNX1	0.607784	1.10012e-31
ENSG00000254485	TPTE2	0.621907	1.67719e-33
ENSG00000254485	SLC39A5	0.612564	2.73397e-32
ENSG00000254485	ABHD1	0.602758	4.6389e-31
ENSG00000254485	CPNE9	0.621819	1.72233e-33
ENSG00000254485	STXBP5L	0.607834	1.0843e-31
ENSG00000254485	CPLX2	0.600401	9.02984e-31
ENSG00000254485	CLEC4F	0.61171	3.51155e-32
ENSG00000254485	NRSN1	0.647654	4.59886e-37
ENSG00000254485	TEKT5	0.6082	9.75561e-32
ENSG00000254485	CELF3	0.657263	1.7511e-38
ENSG00000254485	TEKT4	0.627215	3.29222e-34
ENSG00000254485	DNAJC5G	0.672532	7.55132e-41
ENSG00000254485	GJB1	0.601008	7.6104e-31
ENSG00000254485	ASPSCR1	0.603438	3.82314e-31
ENSG00000254485	PAH	0.638191	1.02597e-35
ENSG00000254485	MST1	0.604247	3.03677e-31
ENSG00000254485	SLC35D3	0.608972	7.80122e-32
ENSG00000254485	KCNH8	0.602686	4.73446e-31
ENSG00000254485	POU3F2	0.664424	1.41685e-39
ENSG00000254485	ZAR1L	0.60672	1.49527e-31
ENSG00000254485	TEX45	0.63824	1.00984e-35
ENSG00000254485	PHGR1	0.620016	2.97271e-33
ENSG00000254485	LY6L	0.620168	2.83958e-33
ENSG00000255455	SNX19	0.654049	5.29398e-38
ENSG00000255455	VPS26B	0.639994	5.72545e-36
ENSG00000266490	RBM6	0.608339	9.37227e-32
ENSG00000266490	SPPL2B	0.606406	1.63633e-31
ENSG00000266490	TSPOAP1	0.605723	1.99122e-31
ENSG00000266490	LUC7L	0.608628	8.61835e-32
ENSG00000266490	SRRT	0.615982	9.95471e-33
ENSG00000266490	MAPKAPK5	0.624911	6.69862e-34
ENSG00000266490	ZNF302	0.619219	3.77955e-33
ENSG00000266490	PDE6C	0.603887	3.36472e-31
ENSG00000266490	MZF1	0.644695	1.22851e-36
ENSG00000266490	CIRBP	0.619158	3.84992e-33
ENSG00000266490	PABPC1L	0.66717	5.30356e-40
ENSG00000266490	CLASRP	0.663885	1.7164e-39
ENSG00000266490	NSMCE4A	0.630344	1.24204e-34
ENSG00000266490	CDK5RAP3	0.669535	2.25637e-40
ENSG00000266490	C17orf75	0.646028	7.90273e-37
ENSG00000266490	KAT2A	0.61157	3.65902e-32
ENSG00000266490	EZH1	0.614409	1.58706e-32
ENSG00000266490	LUC7L3	0.72861	6.65234e-51
ENSG00000266490	SRSF7	0.628716	2.0657e-34
ENSG00000266490	MTERF2	0.68943	1.22884e-43
ENSG00000266490	NFYB	0.638417	9.53927e-36
ENSG00000266490	ORMDL1	0.663169	2.21306e-39
ENSG00000266490	RPAIN	0.625832	5.04598e-34
ENSG00000266490	PNISR	0.601307	6.99362e-31
ENSG00000266490	GPS2	0.65596	2.74739e-38
ENSG00000266490	PCED1A	0.634859	2.98463e-35
ENSG00000266490	KHDC4	0.64553	9.32216e-37
ENSG00000266490	ARGLU1	0.604912	2.51106e-31
ENSG00000266490	RSAD1	0.622502	1.39943e-33
ENSG00000266490	ATAT1	0.621259	2.04121e-33
ENSG00000266490	NEIL1	0.656006	2.70388e-38
ENSG00000266490	RABL2A	0.65359	6.19438e-38
ENSG00000266490	CCDC150	0.633897	4.05251e-35
ENSG00000266490	GNRH1	0.635876	2.1572e-35
ENSG00000266490	FGF17	0.638113	1.05233e-35
ENSG00000266490	PAXBP1	0.632254	6.8155e-35
ENSG00000266490	CHTOP	0.635706	2.2778e-35
ENSG00000266490	MRNIP	0.620119	2.88179e-33
ENSG00000266490	SRSF2	0.657545	1.5881e-38
ENSG00000266490	SPDYA	0.637244	1.39159e-35
ENSG00000266490	TEPSIN	0.647419	4.9734e-37
ENSG00000266490	PROCA1	0.707973	6.31985e-47
ENSG00000266490	ENSG00000167807	0.622616	1.35188e-33
ENSG00000266490	ING5	0.634479	3.36792e-35
ENSG00000266490	HEXIM2	0.655497	3.22171e-38
ENSG00000266490	ZNF692	0.608096	1.00547e-31
ENSG00000266490	C12orf76	0.626411	4.22049e-34
ENSG00000266490	CCDC57	0.655426	3.30157e-38
ENSG00000266490	DTX3	0.606391	1.64378e-31
ENSG00000266490	ACBD4	0.602244	5.36654e-31
ENSG00000266490	BRICD5	0.68875	1.60434e-43
ENSG00000266490	NPIPA1	0.62133	1.99799e-33
ENSG00000266490	TRIM52	0.61684	7.70856e-33
ENSG00000266490	PLA2G6	0.624545	7.49594e-34
ENSG00000266490	LRRC37B	0.611671	3.55258e-32
ENSG00000266490	ZNF785	0.668944	2.79568e-40
ENSG00000266490	ZNF84	0.604351	2.94802e-31
ENSG00000266490	SFI1	0.672841	6.74064e-41
ENSG00000266490	MDM4	0.640181	5.38972e-36
ENSG00000266490	ZNF830	0.601748	6.17409e-31
ENSG00000266490	LIME1	0.635141	2.72784e-35
ENSG00000266490	AGER	0.676381	1.81645e-41
ENSG00000266490	PJVK	0.60933	7.03127e-32
ENSG00000266490	MRPL53	0.648848	3.08311e-37
ENSG00000266490	C12orf73	0.643826	1.63623e-36
ENSG00000266490	TTLL3	0.665103	1.11225e-39
ENSG00000266490	GOLGA8B	0.619377	3.60441e-33
ENSG00000266490	FAM229A	0.619869	3.10807e-33
ENSG00000266490	SAPCD1	0.642035	2.94464e-36
ENSG00000266490	PPP1R3E	0.613164	2.29125e-32
ENSG00000266490	WBP1	0.654921	3.92667e-38
ENSG00000266490	HYPK	0.654913	3.9374e-38
ENSG00000266490	ZNF709	0.619649	3.32106e-33
ENSG00000266490	YJEFN3	0.642152	2.83477e-36
ENSG00000266490	CDK3	0.714461	3.87509e-48
ENSG00000266490	MSH5-SAPCD1	0.634369	3.48784e-35
ENSG00000266490	POLG2	0.618662	4.46865e-33
ENSG00000266490	ENSG00000258472	0.6707	1.47659e-40
ENSG00000266490	CEP95	0.650978	1.50498e-37
ENSG00000266490	TEN1-CDK3	0.723363	7.3902e-50
ENSG00000266490	NBPF11	0.603577	3.67486e-31
ENSG00000266490	MYO15B	0.689786	1.06822e-43
ENSG00000266490	AARSD1	0.654946	3.89377e-38
ENSG00000266490	ATF7-NPFF	0.683053	1.45846e-42
ENSG00000266490	ZNHIT3	0.619252	3.74301e-33
ENSG00000266490	TADA2A	0.615812	1.04696e-32
ENSG00000270147	SPPL2B	0.604708	2.66243e-31
ENSG00000270147	LUC7L	0.60542	2.17144e-31
ENSG00000270147	PDE6C	0.628656	2.1046e-34
ENSG00000270147	YJU2B	0.604499	2.82577e-31
ENSG00000270147	CDK5RAP3	0.665355	1.01684e-39
ENSG00000270147	LUC7L3	0.655599	3.11087e-38
ENSG00000270147	MTERF2	0.608408	9.1848e-32
ENSG00000270147	OCM	0.600229	9.47739e-31
ENSG00000270147	PCED1A	0.627369	3.13871e-34
ENSG00000270147	KMT5C	0.631298	9.20972e-35
ENSG00000270147	ARGLU1	0.636082	2.01959e-35
ENSG00000270147	CUZD1	0.612288	2.96448e-32
ENSG00000270147	GNRH1	0.697232	5.44971e-45
ENSG00000270147	DPH7	0.628328	2.33067e-34
ENSG00000270147	UBXN11	0.64224	2.75416e-36
ENSG00000270147	DCST2	0.652562	8.79273e-38
ENSG00000270147	TEPSIN	0.622934	1.22672e-33
ENSG00000270147	ANKS3	0.607219	1.29486e-31
ENSG00000270147	ZNF692	0.650006	2.08888e-37
ENSG00000270147	CENPS	0.65946	8.15722e-39
ENSG00000270147	CCDC57	0.611918	3.30389e-32
ENSG00000270147	PIDD1	0.650976	1.50592e-37
ENSG00000270147	ARL6IP4	0.622418	1.43549e-33
ENSG00000270147	BRICD5	0.674716	3.37348e-41
ENSG00000270147	COA5	0.61496	1.34816e-32
ENSG00000270147	PLA2G6	0.617337	6.64602e-33
ENSG00000270147	FAM186A	0.604395	2.91068e-31
ENSG00000270147	CENATAC	0.602795	4.59022e-31
ENSG00000270147	FBF1	0.614977	1.34129e-32
ENSG00000270147	AGER	0.679415	5.81709e-42
ENSG00000270147	PJVK	0.64829	3.71787e-37
ENSG00000270147	MRPL53	0.619107	3.90969e-33
ENSG00000270147	GOLGA8B	0.611957	3.26692e-32
ENSG00000270147	CCNL2	0.617282	6.75514e-33
ENSG00000270147	FAM229A	0.656813	2.0461e-38
ENSG00000270147	SAPCD1	0.673776	4.77539e-41
ENSG00000270147	EGFL8	0.680008	4.64876e-42
ENSG00000270147	CORT	0.603239	4.04598e-31
ENSG00000270147	HYPK	0.637689	1.20603e-35
ENSG00000270147	MSH5-SAPCD1	0.67453	3.61317e-41
ENSG00000270147	ATF7-NPFF	0.66412	1.57902e-39
ENSG00000272182	DPEP1	0.623054	1.18282e-33
ENSG00000272182	SLC18A1	0.615211	1.25151e-32
ENSG00000272182	TSPAN32	0.740357	2.46133e-53
ENSG00000272182	FGF4	0.655171	3.60404e-38
ENSG00000272182	FGF20	0.645376	9.80755e-37
ENSG00000272182	MYH7B	0.6494	2.56165e-37
ENSG00000272182	BAMBI	0.611726	3.49551e-32
ENSG00000272182	IGFALS	0.641435	3.58269e-36
ENSG00000272182	SEZ6L	0.640814	4.38669e-36
ENSG00000272182	MT4	0.634229	3.64657e-35
ENSG00000272182	AURKC	0.625931	4.89548e-34
ENSG00000272182	PKD2L1	0.679187	6.33961e-42
ENSG00000272182	FGF8	0.657772	1.4681e-38
ENSG00000272182	HGFAC	0.666512	6.71825e-40
ENSG00000272182	LRP2BP	0.657447	1.64319e-38
ENSG00000272182	DBX1	0.654121	5.16517e-38
ENSG00000272182	SLC1A2	0.613528	2.05824e-32
ENSG00000272182	C11orf21	0.687899	2.23885e-43
ENSG00000272182	ACSS3	0.635545	2.39786e-35
ENSG00000272182	SLC30A3	0.61998	3.00503e-33
ENSG00000272182	QPCT	0.629646	1.54515e-34
ENSG00000272182	OPRD1	0.674257	3.99821e-41
ENSG00000272182	OLFM3	0.654621	4.35319e-38
ENSG00000272182	HOXB8	0.662559	2.74559e-39
ENSG00000272182	HOXB5	0.622888	1.24431e-33
ENSG00000272182	LYZL1	0.622008	1.62653e-33
ENSG00000272182	DBH	0.61314	2.30746e-32
ENSG00000272182	BMP4	0.624497	7.60784e-34
ENSG00000272182	BHLHE23	0.656721	2.11249e-38
ENSG00000272182	GFRA4	0.644681	1.2342e-36
ENSG00000272182	OTOR	0.648009	4.08428e-37
ENSG00000272182	POLN	0.697021	5.93743e-45
ENSG00000272182	ABHD12B	0.601376	6.85823e-31
ENSG00000272182	ATP1A4	0.657385	1.6786e-38
ENSG00000272182	NMUR2	0.611023	4.2935e-32
ENSG00000272182	TPTE2	0.656181	2.5453e-38
ENSG00000272182	CNMD	0.642627	2.4264e-36
ENSG00000272182	MGARP	0.669303	2.45436e-40
ENSG00000272182	TTPA	0.639393	6.95878e-36
ENSG00000272182	GGH	0.613134	2.31177e-32
ENSG00000272182	PLA2G12B	0.642943	2.18736e-36
ENSG00000272182	SYCP3	0.694254	1.81144e-44
ENSG00000272182	SLC39A5	0.694449	1.67507e-44
ENSG00000272182	NKD1	0.635241	2.6427e-35
ENSG00000272182	ADAMTS18	0.625152	6.22114e-34
ENSG00000272182	ABHD1	0.65523	3.53163e-38
ENSG00000272182	LYG1	0.603605	3.64618e-31
ENSG00000272182	TMEFF2	0.647419	4.97449e-37
ENSG00000272182	CPNE9	0.683876	1.06368e-42
ENSG00000272182	IL17RD	0.627351	3.15655e-34
ENSG00000272182	SHISAL2B	0.661042	4.68724e-39
ENSG00000272182	ADAMTS19	0.636113	1.99981e-35
ENSG00000272182	CPLX2	0.631709	8.09124e-35
ENSG00000272182	ACTL7B	0.652972	7.64704e-38
ENSG00000272182	TRIM48	0.644645	1.24904e-36
ENSG00000272182	CNDP1	0.646612	6.50848e-37
ENSG00000272182	LYZL2	0.616439	8.68873e-33
ENSG00000272182	ALLC	0.656639	2.1733e-38
ENSG00000272182	PTH	0.644148	1.47164e-36
ENSG00000272182	SH2D6	0.643833	1.63266e-36
ENSG00000272182	CLEC4F	0.678008	9.88097e-42
ENSG00000272182	SLC16A12	0.613396	2.14021e-32
ENSG00000272182	XAGE2	0.605653	2.0313e-31
ENSG00000272182	NODAL	0.603427	3.8361e-31
ENSG00000272182	CABP1	0.608715	8.40512e-32
ENSG00000272182	HPD	0.630476	1.19201e-34
ENSG00000272182	PRAC1	0.648973	2.95693e-37
ENSG00000272182	FGF19	0.619322	3.66453e-33
ENSG00000272182	DIRAS3	0.631204	9.48475e-35
ENSG00000272182	KCNJ9	0.634691	3.14806e-35
ENSG00000272182	MSX1	0.667024	5.59059e-40
ENSG00000272182	ALPI	0.640682	4.57938e-36
ENSG00000272182	CTLA4	0.661325	4.24221e-39
ENSG00000272182	CADPS	0.634239	3.63541e-35
ENSG00000272182	DNAJC5G	0.622917	1.2332e-33
ENSG00000272182	OTOP1	0.634439	3.41087e-35
ENSG00000272182	ADAD1	0.64545	9.56988e-37
ENSG00000272182	CARTPT	0.66022	6.25268e-39
ENSG00000272182	DEFA5	0.643854	1.62115e-36
ENSG00000272182	DEFA6	0.643855	1.62067e-36
ENSG00000272182	PHOX2A	0.604683	2.68116e-31
ENSG00000272182	NAT16	0.604176	3.09862e-31
ENSG00000272182	CA4	0.644428	1.34176e-36
ENSG00000272182	AXIN2	0.639391	6.96243e-36
ENSG00000272182	CA7	0.619611	3.35884e-33
ENSG00000272182	ASPSCR1	0.678607	7.88747e-42
ENSG00000272182	TAS2R1	0.642212	2.77901e-36
ENSG00000272182	GSX1	0.645593	9.12943e-37
ENSG00000272182	HOXB9	0.644406	1.35157e-36
ENSG00000272182	TRH	0.644129	1.48082e-36
ENSG00000272182	OR1N1	0.645033	1.09882e-36
ENSG00000272182	PAH	0.622335	1.47255e-33
ENSG00000272182	MOS	0.645875	8.31237e-37
ENSG00000272182	MST1	0.65618	2.54628e-38
ENSG00000272182	KRT28	0.644174	1.45887e-36
ENSG00000272182	CA5A	0.600309	9.26669e-31
ENSG00000272182	PCCA	0.629449	1.64351e-34
ENSG00000272182	FAM9B	0.655435	3.29111e-38
ENSG00000272182	KCNJ10	0.662397	2.90809e-39
ENSG00000272182	LCN15	0.646354	7.09102e-37
ENSG00000272182	TSPYL6	0.650948	1.52018e-37
ENSG00000272182	AMBN	0.646412	6.95491e-37
ENSG00000272182	GPR35	0.688405	1.83633e-43
ENSG00000272182	GDPD4	0.643942	1.57522e-36
ENSG00000272182	RIIAD1	0.645753	8.65772e-37
ENSG00000272182	GRM8	0.662558	2.74646e-39
ENSG00000272182	CLRN3	0.614262	1.6576e-32
ENSG00000272182	DCAF4L1	0.652613	8.64306e-38
ENSG00000272182	NXPH3	0.606928	1.40822e-31
ENSG00000272182	MARCHF11	0.619363	3.61912e-33
ENSG00000272182	C14orf180	0.639544	6.62706e-36
ENSG00000272182	LCN12	0.641782	3.19867e-36
ENSG00000272182	NOTUM	0.648284	3.72513e-37
ENSG00000272182	NRG3	0.646439	6.89326e-37
ENSG00000272182	PRSS38	0.665666	9.096e-40
ENSG00000272182	KRTAP10-8	0.633077	5.25368e-35
ENSG00000272182	OTOG	0.604534	2.79784e-31
ENSG00000272182	BSX	0.616891	7.59313e-33
ENSG00000272182	ZAR1L	0.643039	2.11928e-36
ENSG00000272182	CRYBA4	0.689182	1.35441e-43
ENSG00000272182	KRT39	0.641225	3.83665e-36
ENSG00000272182	TEX43	0.603592	3.66009e-31
ENSG00000272182	AKR1C4	0.616628	8.21287e-33
ENSG00000272182	C1orf146	0.668473	3.3147e-40
ENSG00000272182	SP5	0.650357	1.85598e-37
ENSG00000272182	LY6G5C	0.616825	7.74356e-33
ENSG00000272182	MANSC4	0.644399	1.35452e-36
ENSG00000272182	DDAH2	0.665095	1.11563e-39
ENSG00000272182	EFCAB8	0.65521	3.5564e-38
ENSG00000272182	TRIM51GP	0.632628	6.05529e-35
ENSG00000272182	KRTAP1-3	0.645216	1.0343e-36
ENSG00000272182	SHISA9	0.644665	1.24097e-36
ENSG00000272182	TDGF1	0.647119	5.49722e-37
ENSG00000272182	LY6G6D	0.650557	1.73491e-37
ENSG00000272182	TERB1	0.676331	1.85059e-41
ENSG00000272182	LY6G6F-LY6G6D	0.650706	1.6499e-37
ENSG00000272182	BLOC1S5-TXNDC5	0.601365	6.88077e-31
ENSG00000272182	LY6L	0.653704	5.95792e-38
ENSG00000272182	PKD1L3	0.678854	7.1891e-42
ENTPD1-AS1	TPR	0.613879	1.85629e-32
ENTPD1-AS1	ZFR	0.650086	2.03343e-37
ENTPD1-AS1	THUMPD1	0.600234	9.46306e-31
ENTPD1-AS1	SENP1	0.621087	2.15083e-33
ENTPD1-AS1	RIF1	0.602094	5.59844e-31
ENTPD1-AS1	BTAF1	0.622188	1.53968e-33
ENTPD1-AS1	SIRT1	0.619797	3.17628e-33
ENTPD1-AS1	ADNP	0.621413	1.94805e-33
ENTPD1-AS1	CEP192	0.620585	2.50348e-33
ENTPD1-AS1	SP4	0.606806	1.45875e-31
ENTPD1-AS1	ATE1	0.607776	1.10283e-31
ENTPD1-AS1	EDRF1	0.627549	2.96791e-34
ENTPD1-AS1	SMC3	0.616826	7.74117e-33
ENTPD1-AS1	MTR	0.609249	7.19768e-32
ENTPD1-AS1	SLF2	0.624385	7.872e-34
ENTPD1-AS1	PUS7L	0.600907	7.83027e-31
ENTPD1-AS1	FBXO21	0.643149	2.04435e-36
ENTPD1-AS1	DHX9	0.645232	1.02866e-36
ENTPD1-AS1	CEP350	0.60141	6.79437e-31
ENTPD1-AS1	ASXL2	0.604336	2.9606e-31
ENTPD1-AS1	SNRNP200	0.619476	3.49799e-33
ENTPD1-AS1	SHPRH	0.639026	7.83666e-36
ENTPD1-AS1	ANAPC1	0.625712	5.23633e-34
ENTPD1-AS1	ZBTB39	0.639206	7.39264e-36
ENTPD1-AS1	ZNF518A	0.628003	2.57828e-34
ENTPD1-AS1	RBM12B	0.623516	1.02709e-33
ENTPD1-AS1	GPATCH8	0.607177	1.31093e-31
ENTPD1-AS1	NHLRC2	0.630371	1.23181e-34
ENTPD1-AS1	ZKSCAN8	0.610727	4.68138e-32
ENTPD1-AS1	FAN1	0.615246	1.23864e-32
ENTPD1-AS1	DCLRE1A	0.67599	2.1011e-41
ENTPD1-AS1	CHUK	0.622501	1.39972e-33
EOGT-DT	RBM5	0.707112	9.10058e-47
EOGT-DT	RBM6	0.651241	1.37647e-37
EOGT-DT	ZNF302	0.62118	2.09114e-33
EOGT-DT	NKTR	0.698462	3.304e-45
EOGT-DT	PTBP2	0.629854	1.44824e-34
EOGT-DT	PNISR	0.6822	2.02104e-42
EOGT-DT	COQ10A	0.610785	4.60229e-32
EOGT-DT	PAXBP1	0.635414	2.50019e-35
EOGT-DT	EOGT	0.653806	5.75359e-38
EOGT-DT	ARIH2	0.644967	1.12314e-36
EOGT-DT	WDR6	0.609124	7.46511e-32
EOGT-DT	EPM2AIP1	0.611956	3.26821e-32
EOGT-DT	CCDC66	0.683033	1.47007e-42
EOGT-DT	TRIM52	0.600791	8.08973e-31
EOGT-DT	ZDHHC17	0.625116	6.29009e-34
EOGT-DT	KLHDC1	0.604158	3.11487e-31
EOGT-DT	TTLL3	0.633746	4.25124e-35
FGD5-AS1	BCLAF1	0.62272	1.30948e-33
FGD5-AS1	FAM13B	0.688343	1.88203e-43
FGD5-AS1	ZFYVE16	0.644772	1.19758e-36
FGD5-AS1	PPP1R12A	0.616689	8.06334e-33
FGD5-AS1	PMS1	0.612946	2.44328e-32
FGD5-AS1	RAD18	0.652251	9.77381e-38
FGD5-AS1	LMAN1	0.618425	4.79806e-33
FGD5-AS1	ZNF37A	0.61851	4.67781e-33
FGD5-AS1	MKRN2	0.760133	9.64801e-58
FGD5-AS1	MLH1	0.689123	1.38602e-43
FGD5-AS1	TOP2B	0.785208	5.50549e-64
FGD5-AS1	USP33	0.636652	1.68293e-35
FGD5-AS1	PCM1	0.640834	4.35829e-36
FGD5-AS1	SENP1	0.667535	4.65136e-40
FGD5-AS1	SMARCA2	0.62324	1.11757e-33
FGD5-AS1	HMGXB4	0.605102	2.37887e-31
FGD5-AS1	ADNP	0.607532	1.18314e-31
FGD5-AS1	CEP192	0.623317	1.09163e-33
FGD5-AS1	CCP110	0.625033	6.45276e-34
FGD5-AS1	SP4	0.658262	1.23809e-38
FGD5-AS1	CASP2	0.600001	1.01037e-30
FGD5-AS1	MAPK8	0.610383	5.17603e-32
FGD5-AS1	ELF2	0.645043	1.09498e-36
FGD5-AS1	GNPTAB	0.619108	3.90851e-33
FGD5-AS1	RIC8B	0.680566	3.76345e-42
FGD5-AS1	MED23	0.604755	2.62639e-31
FGD5-AS1	ERBIN	0.602396	5.13962e-31
FGD5-AS1	CRBN	0.78883	5.88234e-65
FGD5-AS1	OGG1	0.675412	2.60522e-41
FGD5-AS1	ACVR2B	0.635681	2.29617e-35
FGD5-AS1	WDR48	0.815618	8.68591e-73
FGD5-AS1	GORASP1	0.658777	1.03497e-38
FGD5-AS1	NKTR	0.628069	2.52586e-34
FGD5-AS1	NEK4	0.682587	1.74357e-42
FGD5-AS1	SSX2IP	0.631723	8.05667e-35
FGD5-AS1	CASP8AP2	0.671273	1.1976e-40
FGD5-AS1	HELLS	0.612289	2.96371e-32
FGD5-AS1	GORAB	0.611776	3.44474e-32
FGD5-AS1	TMPO	0.681881	2.28256e-42
FGD5-AS1	NFYB	0.615833	1.04046e-32
FGD5-AS1	APAF1	0.617134	7.06168e-33
FGD5-AS1	POLK	0.625669	5.30696e-34
FGD5-AS1	ZNF644	0.640654	4.62059e-36
FGD5-AS1	IFT81	0.611704	3.51773e-32
FGD5-AS1	CDK2	0.601594	6.44933e-31
FGD5-AS1	IKZF4	0.708966	4.14302e-47
FGD5-AS1	KBTBD4	0.610386	5.1709e-32
FGD5-AS1	ZNF780B	0.627124	3.38591e-34
FGD5-AS1	SGO1	0.698036	3.93062e-45
FGD5-AS1	ZNF141	0.625291	5.96015e-34
FGD5-AS1	TBC1D5	0.695713	1.00739e-44
FGD5-AS1	CAPN7	0.819472	5.09614e-74
FGD5-AS1	RBSN	0.759905	1.09061e-57
FGD5-AS1	RAF1	0.808636	1.25429e-70
FGD5-AS1	ZBED3	0.602678	4.74541e-31
FGD5-AS1	SLF1	0.675364	2.65186e-41
FGD5-AS1	THUMPD3	0.721834	1.47448e-49
FGD5-AS1	VHL	0.760468	8.05575e-58
FGD5-AS1	EPC2	0.602828	4.54736e-31
FGD5-AS1	VEZF1	0.610225	5.41986e-32
FGD5-AS1	BRIP1	0.621408	1.95148e-33
FGD5-AS1	CTDSPL2	0.662055	3.28017e-39
FGD5-AS1	BARD1	0.614202	1.68697e-32
FGD5-AS1	CARF	0.668859	2.88325e-40
FGD5-AS1	ZFP14	0.635994	2.07754e-35
FGD5-AS1	POGZ	0.628547	2.17671e-34
FGD5-AS1	FANCD2	0.665906	8.3491e-40
FGD5-AS1	VGLL4	0.612846	2.51607e-32
FGD5-AS1	UBA3	0.622208	1.53046e-33
FGD5-AS1	TMF1	0.658941	9.77738e-39
FGD5-AS1	LIMD1	0.602011	5.73134e-31
FGD5-AS1	DCAF1	0.639101	7.64761e-36
FGD5-AS1	PPIP5K2	0.652132	1.01784e-37
FGD5-AS1	PHIP	0.633403	4.73859e-35
FGD5-AS1	PM20D2	0.624153	8.45334e-34
FGD5-AS1	NGLY1	0.671506	1.09993e-40
FGD5-AS1	RAD9B	0.64353	1.80353e-36
FGD5-AS1	UBP1	0.731025	2.15508e-51
FGD5-AS1	SREK1	0.619649	3.32067e-33
FGD5-AS1	XPC	0.740753	2.0271e-53
FGD5-AS1	CCDC174	0.605668	2.02261e-31
FGD5-AS1	OXNAD1	0.608615	8.65031e-32
FGD5-AS1	DCK	0.620098	2.90063e-33
FGD5-AS1	BRPF1	0.716374	1.67622e-48
FGD5-AS1	EXOG	0.664091	1.59513e-39
FGD5-AS1	APPL1	0.707728	7.01259e-47
FGD5-AS1	DYRK1A	0.628165	2.45167e-34
FGD5-AS1	HLCS	0.607325	1.25589e-31
FGD5-AS1	RBBP4	0.651576	1.22913e-37
FGD5-AS1	USP1	0.658296	1.22389e-38
FGD5-AS1	CGGBP1	0.71492	3.17072e-48
FGD5-AS1	AZI2	0.632131	7.08387e-35
FGD5-AS1	STT3B	0.687521	2.59384e-43
FGD5-AS1	CLASP2	0.695201	1.23841e-44
FGD5-AS1	ATXN7	0.641917	3.06132e-36
FGD5-AS1	RPP14	0.601016	7.59249e-31
FGD5-AS1	KIAA1143	0.761388	4.90311e-58
FGD5-AS1	KIF15	0.678324	8.77614e-42
FGD5-AS1	LZTFL1	0.641299	3.7447e-36
FGD5-AS1	SFMBT1	0.612912	2.46822e-32
FGD5-AS1	PBRM1	0.654991	3.83315e-38
FGD5-AS1	TASOR	0.711408	1.45565e-47
FGD5-AS1	ABHD18	0.609934	5.89801e-32
FGD5-AS1	WDR82	0.649458	2.51268e-37
FGD5-AS1	NEMP1	0.655049	3.75793e-38
FGD5-AS1	SETD5	0.772235	1.17777e-60
FGD5-AS1	CEP120	0.685751	5.16147e-43
FGD5-AS1	FAM161A	0.62019	2.82112e-33
FGD5-AS1	PPM1D	0.62648	4.13209e-34
FGD5-AS1	TMEM43	0.66113	4.54338e-39
FGD5-AS1	DCP2	0.627924	2.6426e-34
FGD5-AS1	ZNF621	0.718496	6.56229e-49
FGD5-AS1	SCAI	0.643904	1.59492e-36
FGD5-AS1	MGA	0.673678	4.95151e-41
FGD5-AS1	ANGEL2	0.659769	7.32096e-39
FGD5-AS1	NR1D2	0.668408	3.39346e-40
FGD5-AS1	CEP135	0.66956	2.23555e-40
FGD5-AS1	DENND6A	0.627895	2.66569e-34
FGD5-AS1	ZNF519	0.623106	1.16415e-33
FGD5-AS1	ALG10B	0.657655	1.52879e-38
FGD5-AS1	ATAD5	0.616317	9.00987e-33
FGD5-AS1	MTX3	0.601326	6.95566e-31
FGD5-AS1	NR2C2	0.822955	3.70278e-75
FGD5-AS1	ZNF620	0.629468	1.63371e-34
FGD5-AS1	ZNF619	0.716334	1.7062e-48
FGD5-AS1	WDR6	0.614019	1.78107e-32
FGD5-AS1	EPM2AIP1	0.717314	1.10744e-48
FGD5-AS1	SUZ12	0.653969	5.44158e-38
FGD5-AS1	ZFP3	0.617392	6.53854e-33
FGD5-AS1	SETD2	0.662884	2.44788e-39
FGD5-AS1	C5orf24	0.636888	1.55997e-35
FGD5-AS1	CNOT10	0.645076	1.08314e-36
FGD5-AS1	LIN9	0.606166	1.75345e-31
FGD5-AS1	KNTC1	0.67347	5.34637e-41
FGD5-AS1	ZNF445	0.704215	3.07475e-46
FGD5-AS1	SP1	0.649746	2.28038e-37
FGD5-AS1	ZNF566	0.601092	7.43176e-31
FGD5-AS1	ZDHHC17	0.64276	2.32232e-36
FGD5-AS1	ZNF546	0.606789	1.46592e-31
FGD5-AS1	SRSF10	0.636753	1.62945e-35
FGD5-AS1	ZNF33A	0.615019	1.32468e-32
FGD5-AS1	ZNF140	0.610091	5.63511e-32
FGD5-AS1	ZFP62	0.613696	1.959e-32
FGD5-AS1	ZBTB14	0.629022	1.87785e-34
FGD5-AS1	QRICH1	0.688368	1.86349e-43
FGD5-AS1	DCLRE1A	0.606444	1.61877e-31
FGD5-AS1	ANKRD28	0.79548	8.62334e-67
FGD5-AS1	METTL6	0.668504	3.27857e-40
FGD5-AS1	SACM1L	0.701984	7.77487e-46
FGD5-AS1	ZNF891	0.600004	1.00941e-30
FGD5-AS1	CYB5RL	0.602208	5.42111e-31
FGD5-AS1	DHFR	0.64337	1.90099e-36
FGD5-AS1	DCP1A	0.618702	4.41556e-33
GAS5-AS1	YBX2	0.631729	8.04109e-35
GAS5-AS1	PTPN18	0.610685	4.73881e-32
GAS5-AS1	JADE1	0.609123	7.46688e-32
GAS5-AS1	CBX7	0.602713	4.69834e-31
GAS5-AS1	ASF1B	0.609682	6.34652e-32
GAS5-AS1	LIG1	0.607761	1.10744e-31
GAS5-AS1	FANCL	0.707557	7.53921e-47
GAS5-AS1	RPA2	0.645617	9.05533e-37
GAS5-AS1	CDKN2C	0.688678	1.65047e-43
GAS5-AS1	GCHFR	0.608118	9.9898e-32
GAS5-AS1	HADH	0.621056	2.17116e-33
GAS5-AS1	RAD9B	0.610535	4.95178e-32
GAS5-AS1	UBXN11	0.651289	1.35468e-37
GAS5-AS1	CHAF1B	0.610424	5.11417e-32
GAS5-AS1	C21orf58	0.64271	2.36121e-36
GAS5-AS1	DCST2	0.602018	5.72032e-31
GAS5-AS1	LEAP2	0.607562	1.17319e-31
GAS5-AS1	CENPS	0.668141	3.73785e-40
GAS5-AS1	PIDD1	0.607027	1.36872e-31
GAS5-AS1	RIPPLY3	0.606061	1.807e-31
GAS5-AS1	SFI1	0.608735	8.35476e-32
HNRNPD-DT	SS18L2	0.612767	2.57567e-32
HNRNPD-DT	RPS20	0.668356	3.45805e-40
HNRNPD-DT	HPF1	0.620879	2.2907e-33
HNRNPD-DT	SNRPA	0.639784	6.12948e-36
HNRNPD-DT	EXOSC5	0.60902	7.69242e-32
HNRNPD-DT	PAFAH1B3	0.664543	1.35828e-39
HNRNPD-DT	HSPB11	0.636169	1.96444e-35
HNRNPD-DT	NAT14	0.617636	6.07833e-33
HNRNPD-DT	DHPS	0.642507	2.52319e-36
HNRNPD-DT	CENPM	0.663373	2.05836e-39
HNRNPD-DT	E2F1	0.613916	1.83586e-32
HNRNPD-DT	PQBP1	0.611719	3.50304e-32
HNRNPD-DT	PIN4	0.631379	8.97811e-35
HNRNPD-DT	R3HCC1	0.659814	7.20832e-39
HNRNPD-DT	SNRNP70	0.630529	1.1724e-34
HNRNPD-DT	CLASRP	0.602931	4.41585e-31
HNRNPD-DT	PIH1D1	0.625178	6.17236e-34
HNRNPD-DT	RNASEH2A	0.631709	8.09177e-35
HNRNPD-DT	YJU2B	0.600591	8.55864e-31
HNRNPD-DT	PTOV1	0.658525	1.12995e-38
HNRNPD-DT	POLR2I	0.61166	3.56398e-32
HNRNPD-DT	RPS19	0.642615	2.43558e-36
HNRNPD-DT	TMEM205	0.666033	7.97664e-40
HNRNPD-DT	LENG1	0.627369	3.1384e-34
HNRNPD-DT	SUGP1	0.609797	6.13771e-32
HNRNPD-DT	PBX4	0.600237	9.45469e-31
HNRNPD-DT	CUEDC2	0.656015	2.69566e-38
HNRNPD-DT	CDK5RAP3	0.677695	1.11106e-41
HNRNPD-DT	RPL34	0.640309	5.16877e-36
HNRNPD-DT	NPRL2	0.613579	2.02783e-32
HNRNPD-DT	RPL24	0.605966	1.85711e-31
HNRNPD-DT	PARK7	0.60274	4.6615e-31
HNRNPD-DT	STMN1	0.609259	7.17708e-32
HNRNPD-DT	DYNC2I2	0.618498	4.69479e-33
HNRNPD-DT	MND1	0.679444	5.75321e-42
HNRNPD-DT	WDR83	0.632562	6.18401e-35
HNRNPD-DT	PFDN5	0.644586	1.27352e-36
HNRNPD-DT	ATP5F1E	0.627217	3.29026e-34
HNRNPD-DT	SNRPD2	0.644641	1.2509e-36
HNRNPD-DT	TIMM17B	0.644332	1.38491e-36
HNRNPD-DT	PIN1	0.638831	8.34561e-36
HNRNPD-DT	DUT	0.649227	2.71493e-37
HNRNPD-DT	LSM4	0.628585	2.15153e-34
HNRNPD-DT	ATP5IF1	0.61537	1.19395e-32
HNRNPD-DT	ZNF428	0.639822	6.05531e-36
HNRNPD-DT	NDUFA2	0.649789	2.24754e-37
HNRNPD-DT	ILKAP	0.625234	6.06582e-34
HNRNPD-DT	PCED1A	0.670479	1.60034e-40
HNRNPD-DT	TMEM258	0.600581	8.5833e-31
HNRNPD-DT	BLOC1S1	0.640947	4.20082e-36
HNRNPD-DT	ARL3	0.645505	9.39935e-37
HNRNPD-DT	PPCDC	0.626672	3.894e-34
HNRNPD-DT	SNRPF	0.622128	1.56811e-33
HNRNPD-DT	PIF1	0.634073	3.83171e-35
HNRNPD-DT	NARF	0.623055	1.18239e-33
HNRNPD-DT	RPS11	0.62188	1.69064e-33
HNRNPD-DT	RPS27A	0.631684	8.15478e-35
HNRNPD-DT	RPL32	0.625843	5.03017e-34
HNRNPD-DT	RPL7	0.617973	5.49514e-33
HNRNPD-DT	PAXX	0.608841	8.10352e-32
HNRNPD-DT	DPH7	0.6765	1.73741e-41
HNRNPD-DT	COMMD3	0.717303	1.11297e-48
HNRNPD-DT	TEKT5	0.603424	3.83834e-31
HNRNPD-DT	UBXN11	0.679122	6.49748e-42
HNRNPD-DT	CHCHD6	0.638924	8.09737e-36
HNRNPD-DT	IQCC	0.664153	1.56057e-39
HNRNPD-DT	CFAP410	0.618949	4.09981e-33
HNRNPD-DT	RECQL4	0.64039	5.03553e-36
HNRNPD-DT	TEDC2	0.624147	8.46814e-34
HNRNPD-DT	BEND5	0.618379	4.86511e-33
HNRNPD-DT	PTTG1	0.611973	3.25162e-32
HNRNPD-DT	IFI27L1	0.642452	2.56966e-36
HNRNPD-DT	PPP2R3B	0.601184	7.24031e-31
HNRNPD-DT	ZNF444	0.603482	3.77617e-31
HNRNPD-DT	ANKS3	0.619991	2.99543e-33
HNRNPD-DT	DTYMK	0.606208	1.73224e-31
HNRNPD-DT	CENPX	0.626324	4.33666e-34
HNRNPD-DT	RPS9	0.669682	2.13898e-40
HNRNPD-DT	RPS21	0.663642	1.87115e-39
HNRNPD-DT	PCP2	0.65335	6.72225e-38
HNRNPD-DT	CENPS	0.735757	2.28502e-52
HNRNPD-DT	SSNA1	0.61741	6.50322e-33
HNRNPD-DT	RBIS	0.684425	8.61229e-43
HNRNPD-DT	PXMP2	0.604209	3.06937e-31
HNRNPD-DT	PIDD1	0.658055	1.33069e-38
HNRNPD-DT	COX14	0.628798	2.01335e-34
HNRNPD-DT	ST20	0.644704	1.22492e-36
HNRNPD-DT	ACBD4	0.613706	1.95325e-32
HNRNPD-DT	ARL6IP4	0.71973	3.7886e-49
HNRNPD-DT	BRICD5	0.657129	1.83434e-38
HNRNPD-DT	NAA38	0.621218	2.06669e-33
HNRNPD-DT	SMDT1	0.700202	1.62126e-45
HNRNPD-DT	NDUFB1	0.620798	2.34711e-33
HNRNPD-DT	SIVA1	0.604204	3.07454e-31
HNRNPD-DT	FAM186A	0.60603	1.82288e-31
HNRNPD-DT	RPS19BP1	0.622925	1.23025e-33
HNRNPD-DT	CCDC157	0.651889	1.10515e-37
HNRNPD-DT	FBF1	0.620265	2.75765e-33
HNRNPD-DT	ZNF775	0.640963	4.17908e-36
HNRNPD-DT	RPL37A	0.627438	3.0719e-34
HNRNPD-DT	RPL23A	0.630744	1.09577e-34
HNRNPD-DT	UBL5	0.617871	5.66443e-33
HNRNPD-DT	CCDC167	0.642419	2.59752e-36
HNRNPD-DT	AGER	0.644981	1.1178e-36
HNRNPD-DT	MRPL53	0.613102	2.33382e-32
HNRNPD-DT	C12orf73	0.619353	3.62991e-33
HNRNPD-DT	SARNP	0.647881	4.2626e-37
HNRNPD-DT	SMIM45	0.648304	3.70042e-37
HNRNPD-DT	PRR22	0.604019	3.24036e-31
HNRNPD-DT	ZNF580	0.626438	4.18662e-34
HNRNPD-DT	MXD3	0.708613	4.81529e-47
HNRNPD-DT	ARL16	0.637873	1.13674e-35
HNRNPD-DT	NPEPL1	0.606701	1.50317e-31
HNRNPD-DT	ZGLP1	0.653563	6.25049e-38
HNRNPD-DT	FAM229A	0.616148	9.47373e-33
HNRNPD-DT	PET100	0.693266	2.68923e-44
HNRNPD-DT	TMA7	0.636549	1.73951e-35
HNRNPD-DT	SMIM26	0.617613	6.1187e-33
HNRNPD-DT	DNAAF10	0.613678	1.96924e-32
HNRNPD-DT	CENPS-CORT	0.68843	1.81894e-43
HNRNPD-DT	BRK1	0.60577	1.96413e-31
HNRNPD-DT	NDUFA7	0.65938	8.38731e-39
INHBA-AS1	INHBA	0.840604	2.44023e-81
JPX	COA5	0.602293	5.29238e-31
JPX	C12orf73	0.60348	3.77782e-31
KDSR-DT	APBA3	0.624199	8.33563e-34
KDSR-DT	NFE2L3	0.606145	1.76407e-31
KDSR-DT	YPEL1	0.608735	8.35546e-32
KDSR-DT	CHADL	0.615133	1.28087e-32
KDSR-DT	TYK2	0.608741	8.34177e-32
KDSR-DT	TMEM205	0.640085	5.55882e-36
KDSR-DT	ISYNA1	0.639934	5.8398e-36
KDSR-DT	PBX4	0.693274	2.68098e-44
KDSR-DT	SMG9	0.625144	6.2362e-34
KDSR-DT	EZH1	0.617149	7.02917e-33
KDSR-DT	ING4	0.601729	6.20728e-31
KDSR-DT	CHPT1	0.634961	2.88939e-35
KDSR-DT	RPA2	0.603753	3.49585e-31
KDSR-DT	ECHDC2	0.603849	3.40167e-31
KDSR-DT	HVCN1	0.618582	4.57717e-33
KDSR-DT	B9D2	0.604374	2.92817e-31
KDSR-DT	ZNF576	0.613175	2.28443e-32
KDSR-DT	KIF25	0.639382	6.9834e-36
KDSR-DT	TRAF2	0.62509	6.34102e-34
KDSR-DT	GADD45G	0.609466	6.75874e-32
KDSR-DT	SLC27A1	0.60647	1.60661e-31
KDSR-DT	ZNF428	0.600686	8.33283e-31
KDSR-DT	CBLN3	0.617064	7.21047e-33
KDSR-DT	ZNF837	0.610529	4.95989e-32
KDSR-DT	TNFRSF14	0.605283	2.25824e-31
KDSR-DT	UBXN11	0.64247	2.55404e-36
KDSR-DT	FBXW5	0.626944	3.58002e-34
KDSR-DT	CHAF1B	0.62082	2.33203e-33
KDSR-DT	CCDC28B	0.644959	1.12588e-36
KDSR-DT	CFAP410	0.61137	3.87961e-32
KDSR-DT	OXER1	0.727806	9.65584e-51
KDSR-DT	DCST2	0.625181	6.16571e-34
KDSR-DT	LGALS9	0.603256	4.02716e-31
KDSR-DT	BCL2	0.625019	6.48168e-34
KDSR-DT	GPR137	0.638552	9.13143e-36
KDSR-DT	PIDD1	0.61194	3.2829e-32
KDSR-DT	MAMDC4	0.614804	1.41187e-32
KDSR-DT	ACBD4	0.611339	3.91505e-32
KDSR-DT	SIGIRR	0.644709	1.22285e-36
KDSR-DT	FBF1	0.623961	8.965e-34
KDSR-DT	CFAP119	0.618339	4.92344e-33
KDSR-DT	ZNF775	0.685088	6.66966e-43
KDSR-DT	MEIG1	0.622907	1.23702e-33
KDSR-DT	SFI1	0.606575	1.55889e-31
KDSR-DT	SMIM45	0.617908	5.60257e-33
KDSR-DT	MXD3	0.607035	1.36574e-31
KDSR-DT	HMSD	0.626358	4.29086e-34
KDSR-DT	LYRM9	0.631989	7.40886e-35
LINC01269	CEACAM6	0.600903	7.83869e-31
LINC01269	TTC9	0.713272	6.50132e-48
LINC01269	SPNS2	0.618621	4.52468e-33
LINC01376	SLC25A40	0.623185	1.13643e-33
LINC01376	DNAJC27	0.604211	3.06785e-31
LINC01376	SPATA6	0.6003	9.2881e-31
LINC01376	KCNS3	0.616096	9.62125e-33
LINC01767	STAG3	0.609423	6.84305e-32
LINC01767	CENPM	0.67006	1.86389e-40
LINC01767	MROH8	0.603075	4.23954e-31
LINC01767	ISYNA1	0.630529	1.17241e-34
LINC01767	ABCA2	0.623437	1.05221e-33
LINC01767	NMU	0.606934	1.406e-31
LINC01767	DDX25	0.602138	5.52969e-31
LINC01767	FANCL	0.62491	6.70074e-34
LINC01767	EPHX2	0.704555	2.66812e-46
LINC01767	CDKN2C	0.621741	1.76381e-33
LINC01767	TRAF2	0.673715	4.8849e-41
LINC01767	PDE6B	0.698115	3.80648e-45
LINC01767	KLHL35	0.615219	1.24852e-32
LINC01767	CENPH	0.643459	1.84617e-36
LINC01767	CLGN	0.621234	2.05698e-33
LINC01767	CCDC28B	0.626913	3.61431e-34
LINC01767	SYCE2	0.652398	9.29891e-38
LINC01767	OXER1	0.628952	1.91933e-34
LINC01767	LDHC	0.674351	3.86054e-41
LINC01767	STXBP6	0.662467	2.83612e-39
LINC01767	ASMTL	0.661428	4.09109e-39
LINC01767	SLC16A11	0.622723	1.30826e-33
LINC01767	MAMDC4	0.620797	2.34801e-33
LINC01767	GPR62	0.657011	1.91086e-38
LINC01767	ZPBP2	0.60391	3.34309e-31
LINC01767	KEL	0.659688	7.53099e-39
LINC01767	CDKL4	0.617745	5.88193e-33
LINC01767	PPM1N	0.631114	9.75536e-35
LINC01767	ARHGEF33	0.632481	6.34433e-35
LINC01767	HMSD	0.737097	1.19956e-52
LINC01767	AJM1	0.647164	5.41603e-37
LINC01767	RDM1	0.709607	3.15201e-47
LINC01975	NR1I3	0.628257	2.38286e-34
LINC01975	FAM3B	0.618617	4.53004e-33
LINC01975	CEND1	0.621977	1.6419e-33
LMF1-AS1	ISL1	0.688181	2.00514e-43
LMF1-AS1	COL19A1	0.650417	1.81862e-37
LMF1-AS1	TSC22D1	0.620486	2.57932e-33
LMF1-AS1	NCALD	0.715236	2.76161e-48
LMF1-AS1	CLIP3	0.653964	5.45023e-38
LMF1-AS1	TYK2	0.691005	6.60374e-44
LMF1-AS1	NPHS2	0.747218	8.10631e-55
LMF1-AS1	VSTM2L	0.653901	5.56951e-38
LMF1-AS1	FXYD6	0.691919	4.59699e-44
LMF1-AS1	FXYD2	0.644701	1.22617e-36
LMF1-AS1	KCNH5	0.723094	8.34839e-50
LMF1-AS1	CLEC1A	0.666903	5.83826e-40
LMF1-AS1	CCDC74B	0.626278	4.39837e-34
LMF1-AS1	LGI2	0.779318	1.90978e-62
LMF1-AS1	AIRE	0.81168	1.47215e-71
LMF1-AS1	B4GALNT2	0.679446	5.74988e-42
LMF1-AS1	ABCA3	0.641612	3.38181e-36
LMF1-AS1	SCN11A	0.808464	1.41394e-70
LMF1-AS1	ATOH8	0.649395	2.56631e-37
LMF1-AS1	AR	0.606446	1.61759e-31
LMF1-AS1	PARM1	0.722167	1.26901e-49
LMF1-AS1	ADGRG2	0.707755	6.93295e-47
LMF1-AS1	CNTD1	0.618131	5.24052e-33
LMF1-AS1	DSCAML1	0.737975	7.84971e-53
LMF1-AS1	OR4F5	0.728522	6.93179e-51
LMF1-AS1	BPIFB4	0.627138	3.37154e-34
LMF1-AS1	HMX3	0.636887	1.5605e-35
LMF1-AS1	CTSE	0.642993	2.15182e-36
LMF1-AS1	CCNI2	0.684523	8.29137e-43
LMF1-AS1	XKR4	0.784066	1.10492e-63
LMF1-AS1	PRCD	0.619069	3.95398e-33
lnc-ACTR8-1	RBM5	0.662641	2.66703e-39
lnc-ACTR8-1	NISCH	0.66831	3.5164e-40
lnc-ACTR8-1	CHDH	0.679691	5.24172e-42
lnc-ACTR8-1	FAM13B	0.60897	7.80462e-32
lnc-ACTR8-1	IP6K2	0.639187	7.439e-36
lnc-ACTR8-1	ZNF302	0.613457	2.10183e-32
lnc-ACTR8-1	MZF1	0.600193	9.57321e-31
lnc-ACTR8-1	EZH1	0.65746	1.63568e-38
lnc-ACTR8-1	LUC7L3	0.607478	1.20186e-31
lnc-ACTR8-1	ACTR8	0.635207	2.67152e-35
lnc-ACTR8-1	CRBN	0.63533	2.5686e-35
lnc-ACTR8-1	WDR48	0.614575	1.51084e-32
lnc-ACTR8-1	NKTR	0.617291	6.73858e-33
lnc-ACTR8-1	PIK3R3	0.605006	2.44479e-31
lnc-ACTR8-1	ZNF780B	0.615126	1.28355e-32
lnc-ACTR8-1	ZNF141	0.618517	4.66815e-33
lnc-ACTR8-1	PNISR	0.625395	5.77304e-34
lnc-ACTR8-1	VHL	0.607287	1.26983e-31
lnc-ACTR8-1	PAN2	0.679254	6.18222e-42
lnc-ACTR8-1	CSAD	0.604426	2.88581e-31
lnc-ACTR8-1	ZNF740	0.629282	1.73162e-34
lnc-ACTR8-1	ZFP14	0.677822	1.05958e-41
lnc-ACTR8-1	LMO4	0.606794	1.46362e-31
lnc-ACTR8-1	RABL2A	0.644946	1.13089e-36
lnc-ACTR8-1	AGBL3	0.620313	2.71829e-33
lnc-ACTR8-1	NGLY1	0.643661	1.72792e-36
lnc-ACTR8-1	XPC	0.649227	2.71534e-37
lnc-ACTR8-1	CACNA1D	0.63033	1.24777e-34
lnc-ACTR8-1	PAXBP1	0.654246	4.94849e-38
lnc-ACTR8-1	MRNIP	0.618358	4.89584e-33
lnc-ACTR8-1	RBBP4	0.627368	3.13911e-34
lnc-ACTR8-1	STK36	0.644299	1.40031e-36
lnc-ACTR8-1	RPP14	0.624443	7.7336e-34
lnc-ACTR8-1	KIAA1143	0.70744	7.92087e-47
lnc-ACTR8-1	LZTFL1	0.647208	5.33591e-37
lnc-ACTR8-1	ZNF589	0.640172	5.40424e-36
lnc-ACTR8-1	PLXNB1	0.651026	1.48075e-37
lnc-ACTR8-1	RIC3	0.620411	2.63855e-33
lnc-ACTR8-1	ZMAT1	0.657367	1.68948e-38
lnc-ACTR8-1	DRC3	0.605266	2.26972e-31
lnc-ACTR8-1	USP19	0.634679	3.16065e-35
lnc-ACTR8-1	ADCY6	0.612309	2.94622e-32
lnc-ACTR8-1	ARIH2	0.626185	4.52563e-34
lnc-ACTR8-1	ZNF620	0.608433	9.11972e-32
lnc-ACTR8-1	SH2B1	0.63181	7.8395e-35
lnc-ACTR8-1	WDR6	0.705944	1.48954e-46
lnc-ACTR8-1	P4HTM	0.630371	1.23177e-34
lnc-ACTR8-1	EPM2AIP1	0.60048	8.82998e-31
lnc-ACTR8-1	CCDC66	0.698555	3.1814e-45
lnc-ACTR8-1	ZNF443	0.603792	3.45671e-31
lnc-ACTR8-1	RNPC3	0.614697	1.45747e-32
lnc-ACTR8-1	ZNF566	0.645421	9.66333e-37
lnc-ACTR8-1	ZNF546	0.626778	3.76828e-34
lnc-ACTR8-1	ZNF33A	0.6043	2.99081e-31
lnc-ACTR8-1	ZFP62	0.607395	1.23111e-31
lnc-ACTR8-1	ZNF84	0.645749	8.66912e-37
lnc-ACTR8-1	SFI1	0.600269	9.37083e-31
lnc-ACTR8-1	ZNF248	0.663769	1.78861e-39
lnc-ACTR8-1	QRICH1	0.662447	2.85693e-39
lnc-ACTR8-1	EFCAB7	0.600083	9.87287e-31
lnc-ACTR8-1	CFAP44	0.635395	2.5159e-35
lnc-ACTR8-1	TTLL3	0.628711	2.06837e-34
lnc-ACTR8-1	ZNF512	0.634968	2.88217e-35
lnc-ACTR8-1	MYO15B	0.604118	3.1501e-31
lnc-ACTR8-1	MLLT6	0.635018	2.83719e-35
lnc-ARHGAP5-2	PAX1	0.619504	3.46911e-33
lnc-ARHGAP5-2	TRAF2	0.669601	2.20306e-40
lnc-ARHGAP5-2	UGT2B28	0.69831	3.51636e-45
lnc-ARHGAP5-2	ASRGL1	0.61737	6.57988e-33
lnc-ARHGAP5-2	LDHC	0.609329	7.03261e-32
lnc-ARHGAP5-2	KRT19	0.653786	5.79313e-38
lnc-ARHGAP5-2	FAM3B	0.699717	1.97827e-45
lnc-ARHGAP5-2	KEL	0.688118	2.05488e-43
lnc-ARHGAP5-2	HMSD	0.619642	3.32789e-33
lnc-ARHGAP5-2	AJM1	0.64282	2.27713e-36
lnc-ARMC1-3	ACYP1	0.623795	9.43296e-34
lnc-ARMC1-3	GNRH1	0.646586	6.56413e-37
lnc-ARMC1-3	POLR2K	0.613759	1.92314e-32
lnc-ARMC1-3	NDUFAF6	0.669429	2.34468e-40
lnc-ARMC1-3	IFI27L1	0.637936	1.11405e-35
lnc-CDCA7-1	PHPT1	0.602957	4.38416e-31
lnc-CDCA7-1	TSPO	0.60796	1.04558e-31
lnc-CDCA7-1	KRT36	0.639062	7.74598e-36
lnc-CDCA7-1	FATE1	0.621746	1.761e-33
lnc-COG5-3	KMT2E	0.60411	3.15758e-31
lnc-COG5-3	SLC25A40	0.630862	1.05613e-34
lnc-COG5-3	ZKSCAN1	0.607017	1.37282e-31
lnc-COG5-3	ATXN7L1	0.625291	5.96177e-34
lnc-COG5-3	TMEM168	0.60596	1.86025e-31
lnc-COG5-3	GIGYF1	0.602029	5.70259e-31
lnc-CREB3L4-4	NDUFAF7	0.61136	3.89058e-32
lnc-CREB3L4-4	NDUFAF7	0.61136	3.89058e-32
lnc-CREB3L4-4	HSF2	0.606236	1.71828e-31
lnc-CREB3L4-4	HSF2	0.606236	1.71828e-31
lnc-CREB3L4-4	MZF1	0.60716	1.31716e-31
lnc-CREB3L4-4	MZF1	0.60716	1.31716e-31
lnc-CREB3L4-4	SDR39U1	0.603177	4.11834e-31
lnc-CREB3L4-4	SDR39U1	0.603177	4.11834e-31
lnc-CREB3L4-4	PABPC1L	0.622456	1.41934e-33
lnc-CREB3L4-4	PABPC1L	0.622456	1.41934e-33
lnc-CREB3L4-4	LUC7L3	0.65675	2.09148e-38
lnc-CREB3L4-4	LUC7L3	0.65675	2.09148e-38
lnc-CREB3L4-4	LRP2BP	0.644196	1.44875e-36
lnc-CREB3L4-4	LRP2BP	0.644196	1.44875e-36
lnc-CREB3L4-4	SMIM8	0.63924	7.31061e-36
lnc-CREB3L4-4	SMIM8	0.63924	7.31061e-36
lnc-CREB3L4-4	NPRL2	0.601204	7.20019e-31
lnc-CREB3L4-4	NPRL2	0.601204	7.20019e-31
lnc-CREB3L4-4	TIA1	0.668795	2.95023e-40
lnc-CREB3L4-4	TIA1	0.668795	2.95023e-40
lnc-CREB3L4-4	RSRP1	0.607607	1.158e-31
lnc-CREB3L4-4	RSRP1	0.607607	1.158e-31
lnc-CREB3L4-4	RCOR3	0.605306	2.24373e-31
lnc-CREB3L4-4	RCOR3	0.605306	2.24373e-31
lnc-CREB3L4-4	MTERF2	0.694669	1.53349e-44
lnc-CREB3L4-4	MTERF2	0.694669	1.53349e-44
lnc-CREB3L4-4	NFYB	0.640273	5.23101e-36
lnc-CREB3L4-4	NFYB	0.640273	5.23101e-36
lnc-CREB3L4-4	SPATA1	0.602675	4.74929e-31
lnc-CREB3L4-4	SPATA1	0.602675	4.74929e-31
lnc-CREB3L4-4	RWDD3	0.606227	1.72305e-31
lnc-CREB3L4-4	RWDD3	0.606227	1.72305e-31
lnc-CREB3L4-4	OARD1	0.608452	9.06918e-32
lnc-CREB3L4-4	OARD1	0.608452	9.06918e-32
lnc-CREB3L4-4	ORMDL1	0.638384	9.64109e-36
lnc-CREB3L4-4	ORMDL1	0.638384	9.64109e-36
lnc-CREB3L4-4	RPAIN	0.672383	7.97601e-41
lnc-CREB3L4-4	RPAIN	0.672383	7.97601e-41
lnc-CREB3L4-4	PNISR	0.653823	5.71904e-38
lnc-CREB3L4-4	PNISR	0.653823	5.71904e-38
lnc-CREB3L4-4	KHDC4	0.665433	9.88696e-40
lnc-CREB3L4-4	KHDC4	0.665433	9.88696e-40
lnc-CREB3L4-4	DCAF8	0.661348	4.20772e-39
lnc-CREB3L4-4	DCAF8	0.661348	4.20772e-39
lnc-CREB3L4-4	PAN2	0.618745	4.35917e-33
lnc-CREB3L4-4	PAN2	0.618745	4.35917e-33
lnc-CREB3L4-4	KLC4	0.601574	6.48536e-31
lnc-CREB3L4-4	KLC4	0.601574	6.48536e-31
lnc-CREB3L4-4	ATAT1	0.615641	1.10149e-32
lnc-CREB3L4-4	ATAT1	0.615641	1.10149e-32
lnc-CREB3L4-4	NEIL1	0.689675	1.11568e-43
lnc-CREB3L4-4	NEIL1	0.689675	1.11568e-43
lnc-CREB3L4-4	PPOX	0.651491	1.26499e-37
lnc-CREB3L4-4	PPOX	0.651491	1.26499e-37
lnc-CREB3L4-4	METTL25B	0.602951	4.39114e-31
lnc-CREB3L4-4	METTL25B	0.602951	4.39114e-31
lnc-CREB3L4-4	CCDC150	0.605359	2.20972e-31
lnc-CREB3L4-4	CCDC150	0.605359	2.20972e-31
lnc-CREB3L4-4	AMT	0.679322	6.02457e-42
lnc-CREB3L4-4	AMT	0.679322	6.02457e-42
lnc-CREB3L4-4	PAXBP1	0.608738	8.34755e-32
lnc-CREB3L4-4	PAXBP1	0.608738	8.34755e-32
lnc-CREB3L4-4	CHTOP	0.662662	2.64728e-39
lnc-CREB3L4-4	CHTOP	0.662662	2.64728e-39
lnc-CREB3L4-4	WDR90	0.621057	2.1703e-33
lnc-CREB3L4-4	WDR90	0.621057	2.1703e-33
lnc-CREB3L4-4	DCST1	0.601695	6.26811e-31
lnc-CREB3L4-4	DCST1	0.601695	6.26811e-31
lnc-CREB3L4-4	PROCA1	0.636686	1.66484e-35
lnc-CREB3L4-4	PROCA1	0.636686	1.66484e-35
lnc-CREB3L4-4	HEXIM2	0.647659	4.59019e-37
lnc-CREB3L4-4	HEXIM2	0.647659	4.59019e-37
lnc-CREB3L4-4	TMEM42	0.648761	3.1744e-37
lnc-CREB3L4-4	TMEM42	0.648761	3.1744e-37
lnc-CREB3L4-4	ZNF692	0.601334	6.94027e-31
lnc-CREB3L4-4	ZNF692	0.601334	6.94027e-31
lnc-CREB3L4-4	MST1	0.666281	7.29812e-40
lnc-CREB3L4-4	MST1	0.666281	7.29812e-40
lnc-CREB3L4-4	C12orf76	0.696675	6.82924e-45
lnc-CREB3L4-4	C12orf76	0.696675	6.82924e-45
lnc-CREB3L4-4	GOLGA8A	0.705098	2.12492e-46
lnc-CREB3L4-4	GOLGA8A	0.705098	2.12492e-46
lnc-CREB3L4-4	CCDC14	0.605181	2.32534e-31
lnc-CREB3L4-4	CCDC14	0.605181	2.32534e-31
lnc-CREB3L4-4	CLK2	0.669131	2.6122e-40
lnc-CREB3L4-4	CLK2	0.669131	2.6122e-40
lnc-CREB3L4-4	P4HTM	0.628009	2.57303e-34
lnc-CREB3L4-4	P4HTM	0.628009	2.57303e-34
lnc-CREB3L4-4	COA5	0.6923	3.95089e-44
lnc-CREB3L4-4	COA5	0.6923	3.95089e-44
lnc-CREB3L4-4	TTC32	0.65205	1.04657e-37
lnc-CREB3L4-4	TTC32	0.65205	1.04657e-37
lnc-CREB3L4-4	SETD4	0.641084	4.01735e-36
lnc-CREB3L4-4	SETD4	0.641084	4.01735e-36
lnc-CREB3L4-4	NUDT17	0.622864	1.2532e-33
lnc-CREB3L4-4	NUDT17	0.622864	1.2532e-33
lnc-CREB3L4-4	DUSP28	0.605346	2.21833e-31
lnc-CREB3L4-4	DUSP28	0.605346	2.21833e-31
lnc-CREB3L4-4	KIAA0895L	0.684228	9.28878e-43
lnc-CREB3L4-4	KIAA0895L	0.684228	9.28878e-43
lnc-CREB3L4-4	ZNF700	0.609787	6.15635e-32
lnc-CREB3L4-4	ZNF700	0.609787	6.15635e-32
lnc-CREB3L4-4	ZSCAN16	0.602502	4.98813e-31
lnc-CREB3L4-4	ZSCAN16	0.602502	4.98813e-31
lnc-CREB3L4-4	ZNF785	0.6082	9.75693e-32
lnc-CREB3L4-4	ZNF785	0.6082	9.75693e-32
lnc-CREB3L4-4	SFI1	0.647552	4.75823e-37
lnc-CREB3L4-4	SFI1	0.647552	4.75823e-37
lnc-CREB3L4-4	ZNF248	0.630935	1.03207e-34
lnc-CREB3L4-4	ZNF248	0.630935	1.03207e-34
lnc-CREB3L4-4	MDM4	0.633817	4.15608e-35
lnc-CREB3L4-4	MDM4	0.633817	4.15608e-35
lnc-CREB3L4-4	COX20	0.600741	8.20537e-31
lnc-CREB3L4-4	COX20	0.600741	8.20537e-31
lnc-CREB3L4-4	EFCAB7	0.619427	3.55e-33
lnc-CREB3L4-4	EFCAB7	0.619427	3.55e-33
lnc-CREB3L4-4	PJVK	0.603353	3.91728e-31
lnc-CREB3L4-4	PJVK	0.603353	3.91728e-31
lnc-CREB3L4-4	C12orf73	0.602083	5.6164e-31
lnc-CREB3L4-4	C12orf73	0.602083	5.6164e-31
lnc-CREB3L4-4	TTLL3	0.609448	6.79405e-32
lnc-CREB3L4-4	TTLL3	0.609448	6.79405e-32
lnc-CREB3L4-4	GOLGA8B	0.60444	2.87412e-31
lnc-CREB3L4-4	GOLGA8B	0.60444	2.87412e-31
lnc-CREB3L4-4	SAPCD1	0.648703	3.23699e-37
lnc-CREB3L4-4	SAPCD1	0.648703	3.23699e-37
lnc-CREB3L4-4	WBP1	0.723984	5.57191e-50
lnc-CREB3L4-4	WBP1	0.723984	5.57191e-50
lnc-CREB3L4-4	HYPK	0.654528	4.49313e-38
lnc-CREB3L4-4	HYPK	0.654528	4.49313e-38
lnc-CREB3L4-4	CDK3	0.631078	9.8687e-35
lnc-CREB3L4-4	CDK3	0.631078	9.8687e-35
lnc-CREB3L4-4	MSH5-SAPCD1	0.661621	3.82267e-39
lnc-CREB3L4-4	MSH5-SAPCD1	0.661621	3.82267e-39
lnc-CREB3L4-4	ZNF10	0.624363	7.9272e-34
lnc-CREB3L4-4	ZNF10	0.624363	7.9272e-34
lnc-CREB3L4-4	POLG2	0.621026	2.19047e-33
lnc-CREB3L4-4	POLG2	0.621026	2.19047e-33
lnc-CREB3L4-4	CEP95	0.630444	1.20395e-34
lnc-CREB3L4-4	CEP95	0.630444	1.20395e-34
lnc-CREB3L4-4	TEN1-CDK3	0.61158	3.64799e-32
lnc-CREB3L4-4	TEN1-CDK3	0.61158	3.64799e-32
lnc-CREB3L4-4	NBPF11	0.617425	6.47343e-33
lnc-CREB3L4-4	NBPF11	0.617425	6.47343e-33
lnc-CREB3L4-4	MYO15B	0.620127	2.87481e-33
lnc-CREB3L4-4	MYO15B	0.620127	2.87481e-33
lnc-CWF19L2-1	FAM76B	0.612816	2.53845e-32
lnc-CWF19L2-1	NPAT	0.658423	1.17089e-38
lnc-CWF19L2-1	ATM	0.634902	2.94373e-35
lnc-CWF19L2-1	CWF19L2	0.625909	4.92745e-34
lnc-CXCR5-1	PLEKHJ1	0.614119	1.72882e-32
lnc-CXCR5-1	RPS19	0.617629	6.09005e-33
lnc-CXCR5-1	MRPS26	0.625315	5.91664e-34
lnc-CXCR5-1	LSM7	0.637828	1.15355e-35
lnc-CXCR5-1	LSM4	0.622373	1.45567e-33
lnc-CXCR5-1	TMEM160	0.636032	2.05274e-35
lnc-CXCR5-1	BLOC1S1	0.608201	9.75166e-32
lnc-CXCR5-1	CLDND2	0.661618	3.82703e-39
lnc-CXCR5-1	MESP1	0.666469	6.82228e-40
lnc-CXCR5-1	SMIM4	0.620641	2.46127e-33
lnc-CXCR5-1	DCXR	0.607428	1.21923e-31
lnc-CXCR5-1	BBLN	0.616704	8.02757e-33
lnc-CXCR5-1	RPS21	0.616981	7.39116e-33
lnc-CXCR5-1	FGFBP3	0.601549	6.5323e-31
lnc-CXCR5-1	DPP7	0.624083	8.63654e-34
lnc-CXCR5-1	DPM3	0.614379	1.60097e-32
lnc-CXCR5-1	ARL6IP4	0.602554	4.91448e-31
lnc-CXCR5-1	NDUFB1	0.6329	5.55638e-35
lnc-CXCR5-1	ENSG00000187186	0.629882	1.43537e-34
lnc-CXCR5-1	CYHR1	0.620752	2.38033e-33
lnc-CXCR5-1	SYCE1L	0.605319	2.23547e-31
lnc-CXCR5-1	ZNF580	0.606492	1.59638e-31
lnc-CXCR5-1	C19orf73	0.617981	5.48142e-33
lnc-CXCR5-1	SMIM27	0.63015	1.31993e-34
lnc-CXCR5-1	INAFM1	0.641954	3.02432e-36
lnc-CXCR5-1	NDUFA7	0.634416	3.43667e-35
lnc-ENDOU-7	METTL1	0.62897	1.90818e-34
lnc-ENDOU-7	PDCD5	0.601504	6.61459e-31
lnc-ENDOU-7	DGUOK	0.612905	2.47317e-32
lnc-ENDOU-7	SMUG1	0.612815	2.53958e-32
lnc-ENDOU-7	NDUFAF4	0.61603	9.81346e-33
lnc-ENDOU-7	PTRH2	0.644996	1.11226e-36
lnc-ENDOU-7	SNRPE	0.642946	2.18536e-36
lnc-ENDOU-7	CNPY2	0.62662	3.9575e-34
lnc-ESAM-65	RBM6	0.606068	1.80361e-31
lnc-ESAM-65	LUC7L3	0.625103	6.31478e-34
lnc-ESAM-65	MSANTD2	0.606212	1.73014e-31
lnc-ESAM-65	ARGLU1	0.637549	1.2616e-35
lnc-ESAM-65	CENATAC	0.632789	5.75626e-35
lnc-ESAM-65	AGER	0.61751	6.31043e-33
lnc-ESAM-65	GABBR1	0.638024	1.08265e-35
lnc-ESAM-65	SAPCD1	0.660147	6.41445e-39
lnc-ESAM-65	EGFL8	0.674495	3.66096e-41
lnc-ESAM-65	MSH5-SAPCD1	0.620412	2.63815e-33
lnc-ESAM-65	PPT2-EGFL8	0.617945	5.54047e-33
lnc-FGF3-4	NCKAP1	0.618117	5.26266e-33
lnc-FGF3-4	RXRG	0.648208	3.82153e-37
lnc-FGF3-4	SHANK2	0.856217	1.80055e-87
lnc-HIST1H2BJ-3	NMU	0.622859	1.25533e-33
lnc-HIST1H2BJ-3	H2BC11	0.861155	1.45653e-89
lnc-HIST1H2BJ-3	OR2B6	0.884883	6.98359e-101
lnc-HIST1H2BJ-3	C1QL1	0.632826	5.68922e-35
lnc-HIST1H2BJ-3	LIN28A	0.609856	6.03383e-32
lnc-HIST1H2BJ-3	C9orf40	0.636711	1.65121e-35
lnc-HIST1H2BJ-3	TAAR8	0.616259	9.16567e-33
lnc-HIST1H2BJ-3	TEX30	0.73803	7.64027e-53
lnc-HIST1H2BJ-3	CAMK2N2	0.638583	9.04185e-36
lnc-HIST1H2BJ-3	CLRN2	0.654056	5.2825e-38
lnc-HIST1H2BJ-3	H3C8	0.633461	4.65289e-35
lnc-HIST1H2BJ-3	H2BC17	0.844858	6.08461e-83
lnc-HIST1H2BJ-3	H4C9	0.673492	5.30222e-41
lnc-HIST1H2BJ-3	CCDC92B	0.632757	5.81451e-35
lnc-HMX1-1	RIPOR3	0.69042	8.3203e-44
lnc-HMX1-1	PHPT1	0.640507	4.84756e-36
lnc-HMX1-1	RELB	0.618963	4.08292e-33
lnc-HMX1-1	ESRRB	0.624665	7.22506e-34
lnc-HMX1-1	MATN4	0.648496	3.46951e-37
lnc-HMX1-1	PAX1	0.601519	6.58819e-31
lnc-HMX1-1	TRAF2	0.78309	1.99598e-63
lnc-HMX1-1	CYP2E1	0.633038	5.31952e-35
lnc-HMX1-1	PDE6B	0.837079	4.79306e-80
lnc-HMX1-1	FXYD2	0.792219	6.97106e-66
lnc-HMX1-1	REN	0.606098	1.78802e-31
lnc-HMX1-1	STAR	0.610853	4.51238e-32
lnc-HMX1-1	C11orf53	0.653967	5.44559e-38
lnc-HMX1-1	ENPP3	0.606911	1.41528e-31
lnc-HMX1-1	CCDC28B	0.653735	5.89546e-38
lnc-HMX1-1	CCDC74A	0.613305	2.19823e-32
lnc-HMX1-1	GNG8	0.693393	2.55645e-44
lnc-HMX1-1	PYDC1	0.759716	1.20733e-57
lnc-HMX1-1	OR5AR1	0.696391	7.66139e-45
lnc-HMX1-1	C8G	0.637294	1.36936e-35
lnc-HMX1-1	MAMDC4	0.680786	3.46172e-42
lnc-HMX1-1	EXD1	0.610586	4.87814e-32
lnc-HMX1-1	FAM163B	0.708138	5.89283e-47
lnc-HMX1-1	MEIG1	0.602819	4.55891e-31
lnc-HMX1-1	KEL	0.757563	3.80956e-57
lnc-HMX1-1	EXOC3L4	0.749072	3.1628e-55
lnc-HMX1-1	HMSD	0.704087	3.24347e-46
lnc-HMX1-1	AJM1	0.6711	1.27588e-40
lnc-HNRNPD-1	NOX1	0.630184	1.30602e-34
lnc-HNRNPD-1	XRCC1	0.616609	8.25793e-33
lnc-HNRNPD-1	ZNF446	0.634056	3.85215e-35
lnc-HNRNPD-1	CIRBP	0.655314	3.43083e-38
lnc-HNRNPD-1	CHADL	0.609593	6.51352e-32
lnc-HNRNPD-1	LIG1	0.615694	1.08419e-32
lnc-HNRNPD-1	TMEM205	0.602803	4.58e-31
lnc-HNRNPD-1	SUGP1	0.614034	1.77304e-32
lnc-HNRNPD-1	PBX4	0.658475	1.14969e-38
lnc-HNRNPD-1	CDK5RAP3	0.612669	2.65051e-32
lnc-HNRNPD-1	FANCL	0.6222	1.53413e-33
lnc-HNRNPD-1	ECHDC2	0.653378	6.65773e-38
lnc-HNRNPD-1	B9D2	0.686191	4.35233e-43
lnc-HNRNPD-1	ZNF576	0.615391	1.18631e-32
lnc-HNRNPD-1	DUT	0.619655	3.31528e-33
lnc-HNRNPD-1	PCED1A	0.65353	6.32297e-38
lnc-HNRNPD-1	GNRH1	0.611402	3.84367e-32
lnc-HNRNPD-1	UBXN11	0.752168	6.4446e-56
lnc-HNRNPD-1	C21orf58	0.603308	3.96733e-31
lnc-HNRNPD-1	OXER1	0.621943	1.65855e-33
lnc-HNRNPD-1	PCP2	0.613463	2.09857e-32
lnc-HNRNPD-1	CENPS	0.699108	2.53791e-45
lnc-HNRNPD-1	PIDD1	0.67274	6.99392e-41
lnc-HNRNPD-1	ARL6IP4	0.623471	1.0413e-33
lnc-HNRNPD-1	BRICD5	0.604079	3.18542e-31
lnc-HNRNPD-1	SMDT1	0.607353	1.24598e-31
lnc-HNRNPD-1	DUSP28	0.637429	1.31124e-35
lnc-HNRNPD-1	CFAP119	0.6248	6.93161e-34
lnc-HNRNPD-1	ZNF775	0.605538	2.09944e-31
lnc-HNRNPD-1	SFI1	0.638368	9.69216e-36
lnc-HNRNPD-1	SMIM45	0.624897	6.72918e-34
lnc-HNRNPD-1	MXD3	0.623031	1.19105e-33
lnc-HNRNPD-1	FAM229A	0.621747	1.76061e-33
lnc-HNRNPD-1	ENSG00000280433	0.636158	1.97159e-35
lnc-JMJD7-PLA2G4B-5	TRPV3	0.645979	8.03154e-37
lnc-JMJD7-PLA2G4B-5	PLA2G4E	0.715325	2.65579e-48
lnc-KBTBD3-1	EBLN2	0.60711	1.33647e-31
lnc-KLHL11-1	NDUFAF7	0.618561	4.60597e-33
lnc-KLHL11-1	MBTD1	0.658265	1.237e-38
lnc-KLHL11-1	SPAST	0.625989	4.80848e-34
lnc-KLHL11-1	ELAVL1	0.603746	3.50269e-31
lnc-KLHL11-1	TUBE1	0.627604	2.91797e-34
lnc-KLHL11-1	GMCL1	0.654877	3.98686e-38
lnc-KLHL11-1	METTL2A	0.607064	1.35407e-31
lnc-KLHL11-1	DHX40	0.638093	1.05907e-35
lnc-KLHL11-1	TUBD1	0.635838	2.18348e-35
lnc-KLHL11-1	C17orf75	0.600411	9.00312e-31
lnc-KLHL11-1	SMIM8	0.642848	2.25633e-36
lnc-KLHL11-1	ORC4	0.630287	1.26464e-34
lnc-KLHL11-1	NFYB	0.667342	4.98592e-40
lnc-KLHL11-1	COIL	0.639223	7.35162e-36
lnc-KLHL11-1	ORMDL1	0.603655	3.59468e-31
lnc-KLHL11-1	TRA2B	0.619082	3.93908e-33
lnc-KLHL11-1	PPM1B	0.604572	2.76741e-31
lnc-KLHL11-1	SRP9	0.614634	1.48471e-32
lnc-KLHL11-1	LIPT1	0.608172	9.8351e-32
lnc-KLHL11-1	RMND5A	0.626761	3.78867e-34
lnc-KLHL11-1	DGKE	0.654559	4.44571e-38
lnc-KLHL11-1	COX11	0.683017	1.47891e-42
lnc-KLHL11-1	USP39	0.691442	5.55399e-44
lnc-KLHL11-1	C2orf68	0.600784	8.10603e-31
lnc-KLHL11-1	E2F6	0.639224	7.34971e-36
lnc-KLHL11-1	SCAI	0.603236	4.05005e-31
lnc-KLHL11-1	C12orf76	0.60949	6.71216e-32
lnc-KLHL11-1	ZNF77	0.609865	6.01812e-32
lnc-KLHL11-1	COA5	0.616094	9.62815e-33
lnc-KLHL11-1	RAD51D	0.60026	9.39289e-31
lnc-KLHL11-1	ZNF566	0.60988	5.99138e-32
lnc-KLHL11-1	PPP1CC	0.60519	2.3191e-31
lnc-KLHL11-1	MRPL42	0.639331	7.10009e-36
lnc-KLHL11-1	TSEN15	0.619524	3.4486e-33
lnc-KLHL11-1	RUNDC1	0.646192	7.48385e-37
lnc-KLHL11-1	KLHL23	0.626685	3.87903e-34
lnc-KLHL11-1	ZNF670	0.606781	1.46903e-31
lnc-MSRB3-3	ZBTB32	0.721059	2.08944e-49
lnc-MSRB3-3	ATP6V1H	0.668458	3.33341e-40
lnc-MSRB3-3	NCKAP1	0.819906	3.6877e-74
lnc-MSRB3-3	RXYLT1	0.669868	1.99866e-40
lnc-MSRB3-3	CST8	0.669333	2.42796e-40
lnc-MSRB3-3	RXRG	0.881757	2.96486e-99
lnc-MSRB3-3	CDH8	0.726669	1.63172e-50
lnc-MSRB3-3	DUSP19	0.690551	7.90025e-44
lnc-MSRB3-3	NUP35	0.72169	1.57338e-49
lnc-MSRB3-3	SP8	0.608355	9.32822e-32
lnc-MSRB3-3	FNTA	0.673891	4.57593e-41
lnc-MSRB3-3	OPRPN	0.810149	4.34543e-71
lnc-MSRB3-3	FGG	0.611478	3.75922e-32
lnc-MSRB3-3	KICS2	0.625859	5.00515e-34
lnc-MSRB3-3	PDE2A	0.799599	5.82289e-68
lnc-NIPA1-2	CTCFL	0.603679	3.57007e-31
lnc-NIPA1-2	PIANP	0.622653	1.33654e-33
lnc-NIPA1-2	INSM1	0.609324	7.04374e-32
lnc-NIPA1-2	SLC25A42	0.6287	2.07569e-34
lnc-NIPA1-2	HMX2	0.693114	2.85706e-44
lnc-NIPA1-2	SOWAHA	0.613701	1.95615e-32
lnc-NIPA1-2	CPLX3	0.603718	3.5304e-31
lnc-NTMT1-2	ENPP3	0.606344	1.66607e-31
lnc-NTMT1-2	PYDC1	0.655306	3.43984e-38
lnc-NTMT1-2	OR5AR1	0.695359	1.16176e-44
lnc-NTMT1-2	FAM163B	0.712828	7.88217e-48
lnc-PGAP2-1	STIM1	0.676521	1.72376e-41
lnc-RBM12B-4	TSPOAP1	0.619974	3.01125e-33
lnc-RBM12B-4	LUC7L	0.623536	1.02074e-33
lnc-RBM12B-4	ZNF446	0.633127	5.17243e-35
lnc-RBM12B-4	PDE6C	0.644579	1.27654e-36
lnc-RBM12B-4	MZF1	0.628937	1.92832e-34
lnc-RBM12B-4	CIRBP	0.63132	9.14416e-35
lnc-RBM12B-4	CDK5RAP3	0.629543	1.59596e-34
lnc-RBM12B-4	LUC7L3	0.640864	4.31611e-36
lnc-RBM12B-4	SYF2	0.616923	7.5197e-33
lnc-RBM12B-4	RSRP1	0.626984	3.53627e-34
lnc-RBM12B-4	ECHDC2	0.610422	5.11763e-32
lnc-RBM12B-4	PCED1A	0.639012	7.87069e-36
lnc-RBM12B-4	KMT5C	0.627397	3.11162e-34
lnc-RBM12B-4	ARGLU1	0.609508	6.6763e-32
lnc-RBM12B-4	NEIL1	0.620193	2.81841e-33
lnc-RBM12B-4	CAPN10	0.620863	2.30147e-33
lnc-RBM12B-4	FAM193B	0.603553	3.70075e-31
lnc-RBM12B-4	GNRH1	0.67043	1.62926e-40
lnc-RBM12B-4	UBXN11	0.632841	5.66245e-35
lnc-RBM12B-4	PWWP3A	0.62307	1.17701e-33
lnc-RBM12B-4	PROCA1	0.602215	5.40954e-31
lnc-RBM12B-4	HEXIM2	0.630258	1.27617e-34
lnc-RBM12B-4	ZNF692	0.646379	7.03254e-37
lnc-RBM12B-4	CCDC57	0.702467	6.36497e-46
lnc-RBM12B-4	PIDD1	0.640862	4.31797e-36
lnc-RBM12B-4	BRICD5	0.614477	1.55541e-32
lnc-RBM12B-4	ZNF785	0.618259	5.04345e-33
lnc-RBM12B-4	STKLD1	0.61839	4.84925e-33
lnc-RBM12B-4	AGER	0.651922	1.09285e-37
lnc-RBM12B-4	PJVK	0.666452	6.86447e-40
lnc-RBM12B-4	GOLGA8B	0.617495	6.33902e-33
lnc-RBM12B-4	CCNL2	0.681919	2.24984e-42
lnc-RBM12B-4	FAM229A	0.675323	2.69306e-41
lnc-RBM12B-4	SAPCD1	0.655871	2.8321e-38
lnc-RBM12B-4	EGFL8	0.624049	8.72755e-34
lnc-RBM12B-4	CORT	0.609047	7.63376e-32
lnc-RBM12B-4	HYPK	0.608628	8.62006e-32
lnc-RBM12B-4	CDK3	0.647335	5.11436e-37
lnc-RBM12B-4	MSH5-SAPCD1	0.651551	1.23933e-37
lnc-RBM12B-4	TEN1-CDK3	0.611298	3.96207e-32
lnc-RBM12B-4	MYO15B	0.602526	4.95421e-31
lnc-RBM12B-4	ATF7-NPFF	0.684853	7.30237e-43
lnc-RBM12B-4	ENSG00000280433	0.620787	2.35493e-33
lnc-RGS5-1	UBE2T	0.618605	4.54577e-33
lnc-RGS5-1	MRPS14	0.67282	6.79269e-41
lnc-RGS5-1	MTERF2	0.656177	2.54924e-38
lnc-RGS5-1	PPOX	0.627331	3.17553e-34
lnc-RGS5-1	IQCC	0.631047	9.96249e-35
lnc-RGS5-1	CHTOP	0.614086	1.74625e-32
lnc-RGS5-1	ACP6	0.604728	2.64727e-31
lnc-RGS5-1	DEPDC4	0.604922	2.50394e-31
lnc-RGS5-1	METTL18	0.621716	1.77709e-33
lnc-RGS5-1	COA5	0.653297	6.84527e-38
lnc-RGS5-1	CHEK2	0.609852	6.04069e-32
lnc-RGS5-1	MRPL53	0.622719	1.30974e-33
lnc-RGS5-1	C12orf73	0.633862	4.09784e-35
lnc-RINT1-3	PUS7	0.616181	9.38127e-33
lnc-RINT1-3	DLD	0.612235	3.01085e-32
lnc-RINT1-3	PMPCB	0.60462	2.72981e-31
lnc-RINT1-3	DNAJC2	0.623514	1.02777e-33
lnc-RINT1-3	DUS4L	0.62128	2.02835e-33
lnc-RINT1-3	CBLL1	0.610548	4.93195e-32
lnc-RINT1-3	RINT1	0.731082	2.09859e-51
lnc-RINT1-3	NAPEPLD	0.621989	1.63568e-33
lnc-RINT1-3	PSMC2	0.642701	2.36831e-36
lnc-RINT1-3	ARMC10	0.616215	9.28668e-33
lnc-RPS25-5	MATR3	0.61125	4.01808e-32
lnc-RPS25-5	NKTR	0.644199	1.44709e-36
lnc-RPS25-5	LHX4	0.64721	5.33297e-37
lnc-RPS25-5	ANKRD61	0.642476	2.54947e-36
lnc-RPS25-5	NPIPB3	0.63628	1.89562e-35
lnc-RPS25-5	EBLN2	0.738042	7.599e-53
lnc-RPS25-5	ENSG00000258461	0.601297	7.01466e-31
lnc-SLC30A7-2	DPH5	0.607487	1.19868e-31
lnc-SLC30A7-2	C1orf52	0.614287	1.64536e-32
lnc-SOS1-1	TNMD	0.683251	1.35235e-42
lnc-SOS1-1	YBX2	0.645624	9.03447e-37
lnc-SOS1-1	NEXMIF	0.731031	2.14923e-51
lnc-SOS1-1	SPO11	0.702447	6.41973e-46
lnc-SOS1-1	CA11	0.645604	9.09629e-37
lnc-SOS1-1	STAG3	0.689326	1.27998e-43
lnc-SOS1-1	GUCY2C	0.675829	2.23061e-41
lnc-SOS1-1	NOX3	0.690341	8.58331e-44
lnc-SOS1-1	SLC12A1	0.688743	1.60887e-43
lnc-SOS1-1	ACTL6B	0.680322	4.12776e-42
lnc-SOS1-1	SMC1B	0.780743	8.18097e-63
lnc-SOS1-1	LXN	0.687068	3.09482e-43
lnc-SOS1-1	SCGN	0.680811	3.42917e-42
lnc-SOS1-1	LRP2	0.697874	4.19921e-45
lnc-SOS1-1	BCKDHB	0.694227	1.83098e-44
lnc-SOS1-1	CHGB	0.648716	3.22297e-37
lnc-SOS1-1	ARHGAP4	0.606032	1.82194e-31
lnc-SOS1-1	CHRD	0.622894	1.24196e-33
lnc-SOS1-1	MYO15A	0.619141	3.86977e-33
lnc-SOS1-1	TEKT2	0.611012	4.30711e-32
lnc-SOS1-1	CENPM	0.622602	1.35752e-33
lnc-SOS1-1	UPK3A	0.613019	2.39151e-32
lnc-SOS1-1	MROH8	0.625497	5.59467e-34
lnc-SOS1-1	SYP	0.708057	6.09961e-47
lnc-SOS1-1	SCML2	0.661938	3.41927e-39
lnc-SOS1-1	TAF7L	0.805736	9.32233e-70
lnc-SOS1-1	NALCN	0.674485	3.67404e-41
lnc-SOS1-1	FGF14	0.664274	1.49478e-39
lnc-SOS1-1	RGCC	0.676623	1.65931e-41
lnc-SOS1-1	ZFR2	0.679791	5.04806e-42
lnc-SOS1-1	PPP1R17	0.650697	1.65444e-37
lnc-SOS1-1	PIP5K1B	0.682027	2.1591e-42
lnc-SOS1-1	CCL1	0.690118	9.37364e-44
lnc-SOS1-1	NMU	0.740121	2.76242e-53
lnc-SOS1-1	DDX25	0.758166	2.76495e-57
lnc-SOS1-1	APOA4	0.645068	1.08622e-36
lnc-SOS1-1	FAM184A	0.639591	6.52589e-36
lnc-SOS1-1	GNAT1	0.693479	2.46953e-44
lnc-SOS1-1	GBE1	0.600211	9.52355e-31
lnc-SOS1-1	PODXL2	0.678726	7.54217e-42
lnc-SOS1-1	CSPG5	0.60858	8.74011e-32
lnc-SOS1-1	ACADL	0.682328	1.92487e-42
lnc-SOS1-1	FANCL	0.635508	2.42693e-35
lnc-SOS1-1	NR5A2	0.692801	3.23637e-44
lnc-SOS1-1	RPA2	0.609832	6.07714e-32
lnc-SOS1-1	ZNF541	0.620771	2.36688e-33
lnc-SOS1-1	GHRH	0.678967	6.88945e-42
lnc-SOS1-1	ELOVL3	0.637145	1.43676e-35
lnc-SOS1-1	SFRP5	0.646434	6.90512e-37
lnc-SOS1-1	CHRNA2	0.682975	1.50297e-42
lnc-SOS1-1	EPHX2	0.608081	1.00961e-31
lnc-SOS1-1	MAPK8IP1	0.686554	3.78025e-43
lnc-SOS1-1	CDKN2C	0.670603	1.52992e-40
lnc-SOS1-1	PCK1	0.678362	8.65015e-42
lnc-SOS1-1	TCP11	0.728622	6.61748e-51
lnc-SOS1-1	RIBC2	0.76516	6.24409e-59
lnc-SOS1-1	VGF	0.660413	5.84306e-39
lnc-SOS1-1	UNC13A	0.670039	1.87853e-40
lnc-SOS1-1	SMPDL3B	0.678136	9.41807e-42
lnc-SOS1-1	PYY	0.661192	4.44614e-39
lnc-SOS1-1	LIN28A	0.646802	6.11012e-37
lnc-SOS1-1	DDC	0.653722	5.92154e-38
lnc-SOS1-1	REEP2	0.617682	5.99423e-33
lnc-SOS1-1	BEX1	0.672476	7.70844e-41
lnc-SOS1-1	SYT6	0.673572	5.14859e-41
lnc-SOS1-1	CGA	0.681605	2.53594e-42
lnc-SOS1-1	GAD2	0.664311	1.47529e-39
lnc-SOS1-1	FOXN4	0.69322	2.73841e-44
lnc-SOS1-1	SKAP1	0.757335	4.29935e-57
lnc-SOS1-1	C17orf64	0.69736	5.17435e-45
lnc-SOS1-1	RNF157	0.648505	3.45897e-37
lnc-SOS1-1	PTH2	0.663402	2.03743e-39
lnc-SOS1-1	MAEL	0.650823	1.58551e-37
lnc-SOS1-1	GASK1A	0.643404	1.87982e-36
lnc-SOS1-1	BHMT	0.631064	9.91249e-35
lnc-SOS1-1	DCDC2	0.675731	2.31379e-41
lnc-SOS1-1	KAAG1	0.660215	6.26328e-39
lnc-SOS1-1	TAAR8	0.625017	6.48469e-34
lnc-SOS1-1	ASTN2	0.665898	8.37206e-40
lnc-SOS1-1	LRRC27	0.690197	9.08639e-44
lnc-SOS1-1	SLC43A1	0.607393	1.23167e-31
lnc-SOS1-1	KLHL35	0.730773	2.42557e-51
lnc-SOS1-1	GPHA2	0.711479	1.41167e-47
lnc-SOS1-1	POU4F1	0.665224	1.06558e-39
lnc-SOS1-1	CENPH	0.632248	6.82839e-35
lnc-SOS1-1	PLCL2	0.707219	8.69999e-47
lnc-SOS1-1	KCNS2	0.68525	6.26325e-43
lnc-SOS1-1	FBXO43	0.624685	7.18117e-34
lnc-SOS1-1	SHCBP1L	0.730139	3.26454e-51
lnc-SOS1-1	SPTBN4	0.652048	1.04707e-37
lnc-SOS1-1	GRIN2C	0.610956	4.37866e-32
lnc-SOS1-1	SYCE2	0.712653	8.50189e-48
lnc-SOS1-1	ASRGL1	0.64666	6.40464e-37
lnc-SOS1-1	TDRD10	0.612157	3.08067e-32
lnc-SOS1-1	CAMKV	0.697796	4.33351e-45
lnc-SOS1-1	SPAG11B	0.66107	4.64109e-39
lnc-SOS1-1	OTOGL	0.63311	5.20052e-35
lnc-SOS1-1	CRABP1	0.674454	3.71623e-41
lnc-SOS1-1	ZCCHC18	0.633054	5.29366e-35
lnc-SOS1-1	LDHC	0.656566	2.22857e-38
lnc-SOS1-1	MEI1	0.665908	8.34398e-40
lnc-SOS1-1	TMEM145	0.658985	9.62566e-39
lnc-SOS1-1	MAJIN	0.603545	3.7087e-31
lnc-SOS1-1	PTF1A	0.685824	5.01663e-43
lnc-SOS1-1	SCGB1D1	0.649222	2.71987e-37
lnc-SOS1-1	STXBP6	0.66671	6.25827e-40
lnc-SOS1-1	GSG1L	0.685901	4.87028e-43
lnc-SOS1-1	NR0B1	0.636382	1.83526e-35
lnc-SOS1-1	MYRIP	0.648181	3.85579e-37
lnc-SOS1-1	CST5	0.614709	1.45216e-32
lnc-SOS1-1	NPTX1	0.687125	3.02675e-43
lnc-SOS1-1	CDK5R2	0.654417	4.66764e-38
lnc-SOS1-1	VAT1L	0.649774	2.25906e-37
lnc-SOS1-1	FOXB1	0.656021	2.68947e-38
lnc-SOS1-1	C1QTNF4	0.649151	2.78538e-37
lnc-SOS1-1	INSM1	0.61086	4.50305e-32
lnc-SOS1-1	KCNH6	0.68455	8.20698e-43
lnc-SOS1-1	ADCY6	0.605793	1.95147e-31
lnc-SOS1-1	SLC16A11	0.602791	4.59522e-31
lnc-SOS1-1	PPM1E	0.63685	1.57941e-35
lnc-SOS1-1	GPR150	0.64934	2.61381e-37
lnc-SOS1-1	SHISA3	0.635204	2.67412e-35
lnc-SOS1-1	NEUROG2	0.604449	2.86625e-31
lnc-SOS1-1	P4HTM	0.623708	9.6861e-34
lnc-SOS1-1	RPRML	0.674942	3.10236e-41
lnc-SOS1-1	WDR97	0.608182	9.80722e-32
lnc-SOS1-1	MEIOC	0.669218	2.53108e-40
lnc-SOS1-1	MAP3K15	0.680274	4.20436e-42
lnc-SOS1-1	GPR62	0.674721	3.36678e-41
lnc-SOS1-1	TMEM132E	0.691363	5.72994e-44
lnc-SOS1-1	OTOL1	0.681602	2.5387e-42
lnc-SOS1-1	CSMD1	0.631676	8.17683e-35
lnc-SOS1-1	TMEM121B	0.631784	7.90312e-35
lnc-SOS1-1	NOG	0.676069	2.04033e-41
lnc-SOS1-1	SIX6	0.700587	1.38386e-45
lnc-SOS1-1	ZPBP2	0.703057	4.9816e-46
lnc-SOS1-1	C17orf58	0.678849	7.20219e-42
lnc-SOS1-1	PRR19	0.695319	1.18071e-44
lnc-SOS1-1	FZD9	0.630537	1.16923e-34
lnc-SOS1-1	SYCP2	0.685328	6.07757e-43
lnc-SOS1-1	SLC35F1	0.671982	9.23871e-41
lnc-SOS1-1	ASMT	0.68385	1.07442e-42
lnc-SOS1-1	WNK3	0.619366	3.61641e-33
lnc-SOS1-1	SLC6A17	0.659264	8.73372e-39
lnc-SOS1-1	ELOVL2	0.613148	2.30266e-32
lnc-SOS1-1	CBY3	0.621438	1.93388e-33
lnc-SOS1-1	CDKL4	0.664448	1.40494e-39
lnc-SOS1-1	C21orf62	0.686063	4.57324e-43
lnc-SOS1-1	NPS	0.680279	4.19573e-42
lnc-SOS1-1	CPEB1	0.648871	3.05987e-37
lnc-SOS1-1	ARHGEF33	0.882634	1.0473e-99
lnc-SOS1-1	GAGE12J	0.66608	7.8445e-40
lnc-SOS1-1	VN1R4	0.631203	9.48647e-35
lnc-SOS1-1	XKR7	0.676776	1.56738e-41
lnc-SOS1-1	TCF24	0.643989	1.55092e-36
lnc-SOS1-1	GFY	0.684087	9.80878e-43
lnc-SOS1-1	CT45A1	0.632437	6.43244e-35
lnc-SOS1-1	MAGIX	0.616867	7.64709e-33
lnc-SOS1-1	ARHGAP19-SLIT1	0.679577	5.47184e-42
lnc-SOS1-1	CCDC92B	0.667585	4.56818e-40
lnc-SOS1-1	RDM1	0.62734	3.16643e-34
lnc-SOS1-1	CT45A6	0.680303	4.15833e-42
lnc-SOX15-1	YBX2	0.71015	2.4982e-47
lnc-SOX15-1	FUZ	0.605954	1.86357e-31
lnc-SOX15-1	PHPT1	0.642739	2.33848e-36
lnc-SOX15-1	STAG3	0.600747	8.18944e-31
lnc-SOX15-1	WDR62	0.603951	3.30388e-31
lnc-SOX15-1	SMC1B	0.650932	1.52813e-37
lnc-SOX15-1	PAFAH1B3	0.627762	2.77873e-34
lnc-SOX15-1	SLC16A8	0.659545	7.91764e-39
lnc-SOX15-1	CENPM	0.700317	1.5465e-45
lnc-SOX15-1	MCM5	0.611942	3.28086e-32
lnc-SOX15-1	E2F1	0.629103	1.83063e-34
lnc-SOX15-1	RNASEH2A	0.651294	1.35202e-37
lnc-SOX15-1	ZFR2	0.694296	1.78101e-44
lnc-SOX15-1	TMEM205	0.669973	1.92438e-40
lnc-SOX15-1	GCDH	0.637872	1.13707e-35
lnc-SOX15-1	RAD51C	0.608231	9.66923e-32
lnc-SOX15-1	RPA2	0.659995	6.76583e-39
lnc-SOX15-1	DYNC2I2	0.634054	3.85529e-35
lnc-SOX15-1	HPCA	0.60201	5.73303e-31
lnc-SOX15-1	WDR83	0.63464	3.19948e-35
lnc-SOX15-1	PIN1	0.601837	6.02108e-31
lnc-SOX15-1	RIBC2	0.732422	1.11676e-51
lnc-SOX15-1	PIMREG	0.654854	4.01871e-38
lnc-SOX15-1	ZNF428	0.601946	5.83883e-31
lnc-SOX15-1	HACL1	0.615196	1.25694e-32
lnc-SOX15-1	BRME1	0.653661	6.04631e-38
lnc-SOX15-1	NABP2	0.607468	1.20547e-31
lnc-SOX15-1	WRAP53	0.630003	1.38221e-34
lnc-SOX15-1	KLHL35	0.673581	5.13254e-41
lnc-SOX15-1	TRIM74	0.679753	5.11938e-42
lnc-SOX15-1	UBXN11	0.610061	5.68537e-32
lnc-SOX15-1	CHAF1B	0.60923	7.23741e-32
lnc-SOX15-1	SYCE2	0.721116	2.03665e-49
lnc-SOX15-1	LDHC	0.624253	8.19811e-34
lnc-SOX15-1	ASMTL	0.613626	1.99967e-32
lnc-SOX15-1	PCP2	0.651633	1.20563e-37
lnc-SOX15-1	MAMDC4	0.611834	3.38687e-32
lnc-SOX15-1	WBP2NL	0.650064	2.04839e-37
lnc-SOX15-1	TRAIP	0.631898	7.62379e-35
lnc-SOX15-1	PNMA3	0.645351	9.89033e-37
lnc-SOX15-1	NR2C2AP	0.637786	1.1691e-35
lnc-SOX15-1	SIGIRR	0.621947	1.65676e-33
lnc-SOX15-1	RNF5	0.604776	2.61106e-31
lnc-SOX15-1	NT5M	0.60691	1.41541e-31
lnc-SOX15-1	SMIM45	0.696365	7.74432e-45
lnc-SOX15-1	MXD3	0.669644	2.16845e-40
lnc-SOX15-1	ARHGEF33	0.604333	2.96269e-31
lnc-SOX15-1	HMSD	0.664229	1.51864e-39
lnc-SOX15-1	AJM1	0.616453	8.65139e-33
lnc-SRPRA-3	TIRAP	0.663705	1.82947e-39
lnc-SRPRA-3	TIRAP	0.663705	1.82947e-39
lnc-SRPRA-3	VPS26B	0.62818	2.43993e-34
lnc-SRPRA-3	VPS26B	0.62818	2.43993e-34
lnc-TCEA3-1	YBX2	0.620143	2.86149e-33
lnc-TCEA3-1	E2F2	0.614181	1.69778e-32
lnc-TCEA3-1	TRIOBP	0.622383	1.45087e-33
lnc-TCEA3-1	ECHDC2	0.60802	1.0276e-31
lnc-TCEA3-1	GCHFR	0.604859	2.55003e-31
lnc-TCEA3-1	UBXN11	0.671278	1.1956e-40
lnc-TCEA3-1	LEAP2	0.614524	1.53394e-32
lnc-TCEA3-1	PCP2	0.613258	2.22896e-32
lnc-TCEA3-1	SIGIRR	0.607172	1.31288e-31
lnc-TCEA3-1	DUSP28	0.610054	5.69557e-32
lnc-TCEA3-1	TCEA3	0.81232	9.33794e-72
lnc-TCEA3-1	AMY2B	0.618286	5.00221e-33
lnc-TET3-2	CREBBP	0.733719	6.04136e-52
lnc-TET3-2	AQR	0.60266	4.76856e-31
lnc-TET3-2	KMT2C	0.666822	6.01052e-40
lnc-TET3-2	ZFR	0.645111	1.07062e-36
lnc-TET3-2	WNK1	0.602772	4.62005e-31
lnc-TET3-2	UHRF1BP1	0.628477	2.22506e-34
lnc-TET3-2	MYO9A	0.651031	1.47823e-37
lnc-TET3-2	ROCK1	0.611208	4.06771e-32
lnc-TET3-2	POLR1A	0.640248	5.27286e-36
lnc-TET3-2	KDM5A	0.687898	2.23974e-43
lnc-TET3-2	BAZ2A	0.660389	5.89377e-39
lnc-TET3-2	CRYBG3	0.627644	2.88244e-34
lnc-TET3-2	RIF1	0.614399	1.59169e-32
lnc-TET3-2	SRCAP	0.630416	1.21466e-34
lnc-TET3-2	ATRX	0.632782	5.76803e-35
lnc-TET3-2	HECTD1	0.609993	5.79797e-32
lnc-TET3-2	EP300	0.726554	1.72046e-50
lnc-TET3-2	DICER1	0.605104	2.37688e-31
lnc-TET3-2	MED13	0.71475	3.41541e-48
lnc-TET3-2	USP34	0.755379	1.20809e-56
lnc-TET3-2	BIRC6	0.748803	3.62628e-55
lnc-TET3-2	STRN	0.603897	3.35484e-31
lnc-TET3-2	ALMS1	0.616577	8.33739e-33
lnc-TET3-2	ASH1L	0.680702	3.57381e-42
lnc-TET3-2	PRRC2C	0.693938	2.05578e-44
lnc-TET3-2	ARID1A	0.630411	1.21642e-34
lnc-TET3-2	UBN1	0.627047	3.46806e-34
lnc-TET3-2	YLPM1	0.605004	2.44641e-31
lnc-TET3-2	AGO2	0.629478	1.62843e-34
lnc-TET3-2	NUP153	0.640084	5.56071e-36
lnc-TET3-2	CNOT1	0.661084	4.6182e-39
lnc-TET3-2	ZNF384	0.67844	8.3989e-42
lnc-TET3-2	UBR4	0.604859	2.54995e-31
lnc-TET3-2	MKLN1	0.618908	4.15015e-33
lnc-TET3-2	TULP4	0.61957	3.40109e-33
lnc-TET3-2	ZNF236	0.657173	1.8066e-38
lnc-TET3-2	LATS1	0.620918	2.26365e-33
lnc-TET3-2	KIDINS220	0.631807	7.84452e-35
lnc-TET3-2	PUM1	0.651994	1.06655e-37
lnc-TET3-2	CEP350	0.653382	6.64954e-38
lnc-TET3-2	USP37	0.604347	2.95157e-31
lnc-TET3-2	SCYL2	0.615776	1.05826e-32
lnc-TET3-2	FBXO11	0.648926	3.00418e-37
lnc-TET3-2	SCAF11	0.600057	9.94697e-31
lnc-TET3-2	SBNO1	0.618119	5.25947e-33
lnc-TET3-2	SETD1B	0.625367	5.82309e-34
lnc-TET3-2	ZFHX3	0.602153	5.50628e-31
lnc-TET3-2	ASXL2	0.734242	4.71101e-52
lnc-TET3-2	SNRNP200	0.610464	5.05457e-32
lnc-TET3-2	NBEAL1	0.623363	1.07615e-33
lnc-TET3-2	SHPRH	0.703483	4.17256e-46
lnc-TET3-2	TAF1	0.610594	4.86703e-32
lnc-TET3-2	ANAPC1	0.693067	2.91109e-44
lnc-TET3-2	RANBP2	0.675863	2.2029e-41
lnc-TET3-2	SMG1	0.600658	8.39835e-31
lnc-TET3-2	RNF111	0.689546	1.17373e-43
lnc-TET3-2	TAOK1	0.652691	8.41684e-38
lnc-TET3-2	B3GALNT2	0.608614	8.65511e-32
lnc-TET3-2	RPRD2	0.607932	1.05425e-31
lnc-TET3-2	ZBTB39	0.634031	3.88355e-35
lnc-TET3-2	KMT2D	0.753948	2.55636e-56
lnc-TET3-2	PRDM10	0.601446	6.72382e-31
lnc-TET3-2	AKAP13	0.611608	3.61861e-32
lnc-TET3-2	BPTF	0.6956	1.05443e-44
lnc-TET3-2	CERS6	0.618672	4.45513e-33
lnc-TET3-2	HCFC1	0.605367	2.20484e-31
lnc-TET3-2	RAPH1	0.65902	9.51047e-39
lnc-TET3-2	PLEKHM3	0.612797	2.55275e-32
lnc-TET3-2	KLHL11	0.811681	1.47151e-71
lnc-TET3-2	PTPN11	0.604189	3.08688e-31
lnc-TET3-2	ZNF609	0.620359	2.68036e-33
lnc-TET3-2	RFX7	0.659806	7.22702e-39
lnc-TET3-2	EP400	0.639337	7.0846e-36
lnc-TET3-2	PRR14L	0.648462	3.50922e-37
lnc-TET3-2	AMER1	0.656386	2.37169e-38
lnc-TET3-2	MRTFB	0.645823	8.45828e-37
lnc-TET3-2	GPATCH8	0.698283	3.55492e-45
lnc-TET3-2	TET3	0.872285	1.37099e-94
lnc-TET3-2	ZNF490	0.624286	8.11507e-34
lnc-TET3-2	ARID2	0.637972	1.10093e-35
lnc-TET3-2	POM121	0.620507	2.56306e-33
lnc-TET3-2	NF1	0.622917	1.23317e-33
lnc-TET3-2	ZNF770	0.624834	6.85969e-34
lnc-TET3-2	SCAF8	0.635794	2.21486e-35
lnc-TET3-2	ATXN1L	0.625992	4.80315e-34
lnc-TET3-2	ENSG00000233757	0.714018	4.69939e-48
lnc-TET3-2	ZBED6	0.712281	9.98703e-48
lnc-TET3-2	ACACA	0.609254	7.18849e-32
lnc-YARS2-4	RBM6	0.606891	1.42341e-31
lnc-YARS2-4	ACSM3	0.616156	9.45266e-33
lnc-YARS2-4	SPPL2B	0.603292	3.98527e-31
lnc-YARS2-4	SOX8	0.60333	3.94249e-31
lnc-YARS2-4	LUC7L	0.635799	2.21146e-35
lnc-YARS2-4	CHDH	0.602709	4.70286e-31
lnc-YARS2-4	IL17RB	0.634785	3.05609e-35
lnc-YARS2-4	CLEC2D	0.612288	2.96491e-32
lnc-YARS2-4	XRCC1	0.609168	7.36949e-32
lnc-YARS2-4	SEC31B	0.733269	7.47922e-52
lnc-YARS2-4	DZANK1	0.60484	2.56353e-31
lnc-YARS2-4	PDE6C	0.628478	2.2246e-34
lnc-YARS2-4	CIRBP	0.629089	1.83879e-34
lnc-YARS2-4	POLR2F	0.618674	4.45262e-33
lnc-YARS2-4	CYP2D6	0.661375	4.16904e-39
lnc-YARS2-4	PABPN1	0.611515	3.71866e-32
lnc-YARS2-4	CACNA1F	0.635177	2.69651e-35
lnc-YARS2-4	SNRNP70	0.670094	1.84108e-40
lnc-YARS2-4	CLASRP	0.682765	1.62895e-42
lnc-YARS2-4	YJU2B	0.651642	1.20171e-37
lnc-YARS2-4	C19orf44	0.601885	5.93961e-31
lnc-YARS2-4	SUGP1	0.610741	4.66217e-32
lnc-YARS2-4	PBX4	0.64614	7.61396e-37
lnc-YARS2-4	SMG9	0.6292	1.77627e-34
lnc-YARS2-4	GHRHR	0.619709	3.26175e-33
lnc-YARS2-4	SPOCK2	0.601306	6.9951e-31
lnc-YARS2-4	CDK5RAP3	0.733933	5.45957e-52
lnc-YARS2-4	EZH1	0.645326	9.97254e-37
lnc-YARS2-4	LUC7L3	0.600898	7.85021e-31
lnc-YARS2-4	ING4	0.627483	3.02996e-34
lnc-YARS2-4	RSRP1	0.60346	3.79931e-31
lnc-YARS2-4	ECHDC2	0.678064	9.67612e-42
lnc-YARS2-4	OCM	0.646979	5.75931e-37
lnc-YARS2-4	ZNF576	0.622684	1.32389e-33
lnc-YARS2-4	CHTF18	0.629659	1.53912e-34
lnc-YARS2-4	QRICH2	0.609255	7.18531e-32
lnc-YARS2-4	SLC52A1	0.648128	3.92433e-37
lnc-YARS2-4	GPS2	0.687045	3.12245e-43
lnc-YARS2-4	PCED1A	0.714167	4.40443e-48
lnc-YARS2-4	KMT5C	0.604472	2.84788e-31
lnc-YARS2-4	ARGLU1	0.621588	1.84751e-33
lnc-YARS2-4	IL11RA	0.677565	1.16658e-41
lnc-YARS2-4	CUZD1	0.690458	8.19609e-44
lnc-YARS2-4	VAMP1	0.63984	6.02044e-36
lnc-YARS2-4	CSAD	0.691353	5.75319e-44
lnc-YARS2-4	CAPN10	0.602486	5.01092e-31
lnc-YARS2-4	RABL2A	0.625445	5.68609e-34
lnc-YARS2-4	FAM193B	0.613876	1.85771e-32
lnc-YARS2-4	GNRH1	0.715154	2.86321e-48
lnc-YARS2-4	DPH7	0.630009	1.37935e-34
lnc-YARS2-4	UBXN11	0.738643	5.67691e-53
lnc-YARS2-4	MRNIP	0.642013	2.96636e-36
lnc-YARS2-4	CTRC	0.709034	4.02484e-47
lnc-YARS2-4	OXER1	0.674671	3.42938e-41
lnc-YARS2-4	DCST2	0.682074	2.12043e-42
lnc-YARS2-4	LEAP2	0.654955	3.88105e-38
lnc-YARS2-4	RAB4B	0.700456	1.46039e-45
lnc-YARS2-4	ENSG00000167807	0.714093	4.54892e-48
lnc-YARS2-4	ANKS3	0.609838	6.06499e-32
lnc-YARS2-4	KCNAB3	0.635884	2.15178e-35
lnc-YARS2-4	ZNF692	0.615251	1.23679e-32
lnc-YARS2-4	CENPS	0.61005	5.70229e-32
lnc-YARS2-4	CCDC57	0.652754	8.23787e-38
lnc-YARS2-4	PIDD1	0.639304	7.16258e-36
lnc-YARS2-4	ST20	0.608991	7.75834e-32
lnc-YARS2-4	ARL6IP4	0.627765	2.77626e-34
lnc-YARS2-4	BRICD5	0.725717	2.52604e-50
lnc-YARS2-4	PLGLB1	0.683897	1.05536e-42
lnc-YARS2-4	NPIPA1	0.675226	2.79163e-41
lnc-YARS2-4	PLA2G6	0.637865	1.1398e-35
lnc-YARS2-4	FAM227A	0.607854	1.07822e-31
lnc-YARS2-4	FAM186A	0.652616	8.63379e-38
lnc-YARS2-4	FBF1	0.641653	3.3367e-36
lnc-YARS2-4	DRICH1	0.611351	3.90101e-32
lnc-YARS2-4	CFAP119	0.670289	1.71531e-40
lnc-YARS2-4	ZNF775	0.68857	1.72155e-43
lnc-YARS2-4	SLC25A29	0.608896	7.97517e-32
[truncated: 588 more rows]
